# Supplementary material for: Morphometric analysis of early Eocene &lt;i&gt;Corbisema&lt;/i&gt; skeletons (Silicoflagellata) in Mors, Denmark
Source: Copernicus journal article supplement (doi:10.5194/jm-37-283-2018), 2018-02-07
Supplement: Supplementary file 1 [file jm-37-283-2018-supplement.zip]

Archive with 4 entries (4 files):
- Tsutsui et al Supp Info.pdf
- 2_SILICO_measure_data_short_spine.pdf
- jm-37-283-2018-supplement-title-page.pdf
- 1_SILICO_measure_data_long_spine.pdf
