# Supplementary material for: Morphometric analysis of early Eocene &lt;i&gt;Corbisema&lt;/i&gt; skeletons (Silicoflagellata) in Mors, Denmark
Source: Copernicus journal article supplement (doi:10.5194/jm-37-283-2018), 2018-02-07
Supplement: Supplementary file 1 [file jm-37-283-2018-supplement.zip › 1_SILICO_measure_data_long_spine.pdf]

1. *Corbisema triacantha* type measured data (long spine type)

| Mors (MOR)  | Light microscope(LTM)  | Slide No.(1, 3, 4, tri, and X) and specimen serial No. | Microscope objective lens (A:x10, and C:x40) | Specimen ID and observation comment or remark | Microscope type (L2: microscope Olympus BX40, L3:microscope Olympus BH2) | Scale (display dots) and length(um) | Spine length(um)<br>No.1,2, 3 | Basal side length(um)<br>No.1,2, 3(clockwise) | Strut length(um)<br>No.1,2, 3(clockwise) | Distance from spine corner to<br>strut attachment position(um)<br>No.1,2. 3(clockwise) |
|-------------|------------------------|--------------------------------------------------------|----------------------------------------------|-----------------------------------------------|--------------------------------------------------------------------------|-------------------------------------|-------------------------------|-----------------------------------------------|------------------------------------------|----------------------------------------------------------------------------------------|
| "MORLTM", " | 1-153", "A", "NO.1-153 |                                                        |                                              |                                               | "L3", 94, 10, 23, 20, 21, 34, 34, 32, 12, 10, 10, 18, 19, 16             |                                     |                               |                                               |                                          |                                                                                        |
| "MORLTM", " | 1-155", "A", "NO.1-155 |                                                        |                                              |                                               | "L3", 59, 10, 28, 30, 31, 37, 35, 34, 12, 13, 13, 18, 17, 18             |                                     |                               |                                               |                                          |                                                                                        |
| "MORLTM", " | 1-156", "A", "NO.1-156 |                                                        |                                              |                                               | "L3", 58, 10, 24, 24, 20, 37, 32, 36, 11, 12, 12, 19, 15, 20             |                                     |                               |                                               |                                          |                                                                                        |
| "MORLTM", " | 1-157", "A", "NO.1-157 |                                                        |                                              |                                               | "L3", 59, 10, 18, 22, 18, 34, 33, 34, 9, 9, 10, 18, 16, 17               |                                     |                               |                                               |                                          |                                                                                        |
| "MORLTM", " | 1-158", "A", "NO.1-158 |                                                        |                                              |                                               | "L3", 60, 10, 21, 20, 21, 32, 36, 34, 13, 11, 14, 16, 18, 17             |                                     |                               |                                               |                                          |                                                                                        |
| "MORLTM", " | 1-162", "A", "NO.1-162 |                                                        |                                              |                                               | "L3", 58, 10, 22, 22, 22, 37, 36, 34, 12, 13, 12, 18, 20, 18             |                                     |                               |                                               |                                          |                                                                                        |
| "MORLTM", " | 1-163", "A", "NO.1-163 |                                                        |                                              |                                               | "L3", 57, 10, 26, 29, 23, 34, 38, 33, 10, 12, 10, 16, 19, 19             |                                     |                               |                                               |                                          |                                                                                        |
| "MORLTM", " | 1-164", "A", "NO.1-164 |                                                        |                                              |                                               | "L3", 58, 10, 29, 28, 27, 32, 36, 33, 11, 10, 11, 16, 19, 17             |                                     |                               |                                               |                                          |                                                                                        |
| "MORLTM", " | 1-168", "A", "NO.1-168 |                                                        |                                              |                                               | "L3", 103, 10, 22, 23, 23, 29, 30, 31, 10, 8, 10, 14, 16, 15             |                                     |                               |                                               |                                          |                                                                                        |
| "MORLTM", " | 1-171", "A", "NO.1-171 |                                                        |                                              |                                               | "L3", 61, 10, 23, 26, 24, 30, 31, 27, 9, 8, 13, 16, 14, 14               |                                     |                               |                                               |                                          |                                                                                        |
| "MORLTM", " | 1-174", "A", "NO.1-174 |                                                        |                                              |                                               | "L3", 100, 10, 22, 15, 25, 29, 35, 31, 12, 10, 9, 13, 18, 17             |                                     |                               |                                               |                                          |                                                                                        |
| "MORLTM", " | 1-176", "A", "NO.1-176 |                                                        |                                              |                                               | "L3", 107, 10, 16, 16, 21, 29, 27, 26, 9, 9, 8, 13, 15, 13               |                                     |                               |                                               |                                          |                                                                                        |
| "MORLTM", " | 1-177", "A", "NO.1-177 |                                                        |                                              |                                               | "L3", 118, 10, 17, 19, 20, 27, 27, 26, 8, 11, 9, 12, 14, 16              |                                     |                               |                                               |                                          |                                                                                        |
| "MORLTM", " | 1-178", "A", "NO.1-178 |                                                        |                                              |                                               | "L3", 119, 10, 18, 17, 16, 21, 23, 21, 6, 6, 7, 10, 11, 11               |                                     |                               |                                               |                                          |                                                                                        |
| "MORLTM", " | 1-183", "A", "NO.1-183 |                                                        |                                              |                                               | "L3", 58, 10, 29, 29, 23, 53, 60, 58, 19, 19, 20, 29, 31, 31             |                                     |                               |                                               |                                          |                                                                                        |
| "MORLTM", " | 1-186", "A", "NO.1-186 |                                                        |                                              |                                               | "L3", 118, 10, 16, 12, 18, 21, 20, 21, 6, 5, 8, 11, 9, 11                |                                     |                               |                                               |                                          |                                                                                        |
| "MORLTM", " | 1-187", "A", "NO.1-187 |                                                        |                                              |                                               | "L3", 120, 10, 10, 16, 17, 22, 23, 21, 8, 8, 7, 13, 11, 10               |                                     |                               |                                               |                                          |                                                                                        |
| "MORLTM", " | 1-189", "A", "NO.1-189 |                                                        |                                              |                                               | "L3", 116, 10, 18, 18, 19, 28, 28, 25, 8, 10, 11, 14, 13, 12             |                                     |                               |                                               |                                          |                                                                                        |
| "MORLTM", " | 1-190", "A", "NO.1-190 |                                                        |                                              |                                               | "L3", 116, 10, 20, 21, 17, 29, 28, 29, 10, 11, 9, 14, 14, 16             |                                     |                               |                                               |                                          |                                                                                        |
| "MORLTM", " | 1-191", "A", "NO.1-191 |                                                        |                                              |                                               | "L3", 105, 10, 21, 23, 22, 26, 25, 26, 9, 8, 8, 14, 14, 13               |                                     |                               |                                               |                                          |                                                                                        |
| "MORLTM", " | 1-193", "A", "NO.1-193 |                                                        |                                              |                                               | "L3", 107, 10, 21, 22, 23, 30, 29, 30, 12, 10, 10, 13, 16, 13            |                                     |                               |                                               |                                          |                                                                                        |
| "MORLTM", " | 1-196", "A", "NO.1-196 |                                                        |                                              |                                               | "L3", 120, 10, 11, 10, 11, 24, 20, 24, 6, 9, 7, 12, 8, 12                |                                     |                               |                                               |                                          |                                                                                        |
| "MORLTM", " | 1-197", "A", "NO.1-197 |                                                        |                                              |                                               | "L3", 61, 10, 22, 24, 21, 33, 36, 35, 10, 13, 12, 16, 16, 18             |                                     |                               |                                               |                                          |                                                                                        |
| "MORLTM", " | 1-201", "A", "NO.1-201 |                                                        |                                              |                                               | "L3", 110, 10, 18, 18, 19, 32, 31, 32, 11, 12, 11, 15, 16, 16            |                                     |                               |                                               |                                          |                                                                                        |
| "MORLTM", " | 1-203", "A", "NO.1-203 |                                                        |                                              |                                               | "L3", 118, 10, 21, 20, 14, 28, 29, 30, 10, 11, 10, 12, 14, 16            |                                     |                               |                                               |                                          |                                                                                        |
| "MORLTM", " | 1-204", "A", "NO.1-204 |                                                        |                                              |                                               | "L3", 119, 10, 12, 11, 10, 16, 17, 15, 6, 3, 5, 9, 10, 6                 |                                     |                               |                                               |                                          |                                                                                        |
| "MORLTM", " | 1-207", "A", "NO.1-207 |                                                        |                                              |                                               | "L3", 119, 10, 10, 15, 17, 22, 23, 21, 8, 8, 8, 12, 11, 10               |                                     |                               |                                               |                                          |                                                                                        |
| "MORLTM", " | 1-208", "A", "NO.1-208 |                                                        |                                              |                                               | "L3", 102, 10, 20, 23, 24, 29, 29, 30, 13, 9, 9, 16, 15, 14              |                                     |                               |                                               |                                          |                                                                                        |
| "MORLTM", " | 1-209", "A", "NO.1-209 |                                                        |                                              |                                               | "L3", 122, 10, 17, 16, 16, 28, 27, 27, 9, 9, 11, 17, 11, 13              |                                     |                               |                                               |                                          |                                                                                        |
| "MORLTM", " | 1-212", "A", "NO.1-212 |                                                        |                                              |                                               | "L3", 60, 10, 21, 18, 22, 33, 30, 31, 7, 10, 11, 17, 13, 16              |                                     |                               |                                               |                                          |                                                                                        |
| "MORLTM", " | 1-213", "A", "NO.1-213 |                                                        |                                              |                                               | "L3", 58, 10, 28, 29, 29, 30, 29, 29, 8, 10, 10, 14, 13, 13              |                                     |                               |                                               |                                          |                                                                                        |
| "MORLTM", " | 1-215", "A", "NO.1-215 |                                                        |                                              |                                               | "L3", 118, 10, 20, 21, 17, 26, 29, 28, 9, 9, 11, 15, 13, 15              |                                     |                               |                                               |                                          |                                                                                        |
| "MORLTM", " | 1-216", "A", "NO.1-216 |                                                        |                                              |                                               | "L3", 105, 10, 20, 17, 23, 35, 33, 32, 11, 12, 11, 21, 15, 13            |                                     |                               |                                               |                                          |                                                                                        |
| "MORLTM", " | 1-217", "A", "NO.1-217 |                                                        |                                              |                                               | "L3", 120, 10, 11, 7, 7, 16, 15, 16, 5, 5, 5, 7, 8, 7                    |                                     |                               |                                               |                                          |                                                                                        |
| "MORLTM", " | 1-223", "A", "NO.1-223 |                                                        |                                              |                                               | "L3", 58, 10, 29, 28, 25, 30, 27, 28, 10, 6, 9, 15, 16, 11               |                                     |                               |                                               |                                          |                                                                                        |
| "MORLTM", " | 1-224", "A", "NO.1-224 |                                                        |                                              |                                               | "L3", 118, 10, 15, 16, 18, 28, 27, 29, 9, 11, 11, 15, 12, 17             |                                     |                               |                                               |                                          |                                                                                        |
| "MORLTM", " | 1-225", "A", "NO.1-225 |                                                        |                                              |                                               | "L3", 61, 10, 23, 23, 24, 38, 39, 37, 11, 13, 13, 18, 19, 19             |                                     |                               |                                               |                                          |                                                                                        |
| "MORLTM", " | 1-226", "A", "NO.1-226 |                                                        |                                              |                                               | "L3", 119, 10, 15, 18, 16, 29, 28, 32, 11, 11, 9, 14, 15, 17             |                                     |                               |                                               |                                          |                                                                                        |
| "MORLTM", " | 1-229", "A", "NO.1-229 |                                                        |                                              |                                               | "L3", 100, 10, 21, 21, 23, 30, 29, 29, 12, 9, 12, 17, 15, 15             |                                     |                               |                                               |                                          |                                                                                        |

"MORLTM", " 1-230", "A", "NO.1-230  
"MORLTM", " 1-231", "A", "NO.1-231  
"MORLTM", " 1-233", "A", "NO.1-233  
"MORLTM", " 1-234", "A", "NO.1-234  
"MORLTM", " 1-235", "A", "NO.1-235  
"MORLTM", " 1-236", "A", "NO.1-236  
"MORLTM", " 1-237", "A", "NO.1-237  
"MORLTM", " 1-238", "A", "NO.1-238  
"MORLTM", " 1-239", "A", "NO.1-239  
"MORLTM", " 1-240", "A", "NO.1-240  
"MORLTM", " 1-241", "A", "NO.1-241  
"MORLTM", " 1-243", "A", "NO.1-243  
"MORLTM", " 1-247", "A", "NO.1-247  
"MORLTM", " 1-249", "A", "NO.1-249  
"MORLTM", " 1-250", "A", "NO.1-250  
"MORLTM", " 1-251", "A", "NO.1-251  
"MORLTM", " 1-254", "A", "NO.1-254  
"MORLTM", " 1-255", "A", "NO.1-255  
"MORLTM", " 1-256", "A", "NO.1-256  
"MORLTM", " 1-257", "A", "NO.1-257  
"MORLTM", " 1-259", "A", "NO.1-259  
"MORLTM", " 1-260", "A", "NO.1-260  
"MORLTM", " 1-263", "A", "NO.1-263  
"MORLTM", " 1-264", "A", "NO.1-264  
"MORLTM", " 1-265", "A", "NO.1-265  
"MORLTM", " 1-266", "A", "NO.1-266A  
"MORLTM", " 1-266", "A", "NO.1-266B  
"MORLTM", " 1-267", "A", "NO.1-267  
"MORLTM", " 1-268", "A", "NO.1-268  
"MORLTM", " 1-270", "A", "NO.1-270  
"MORLTM", " 1-271", "A", "NO.1-271  
"MORLTM", " 1-272", "A", "NO.1-272  
"MORLTM", " 1-274", "A", "NO.1-274  
"MORLTM", " 1-275", "A", "NO.1-275  
"MORLTM", " 1-277", "A", "NO.1-277  
"MORLTM", " 1-278", "A", "NO.1-278  
"MORLTM", " 1-279", "A", "NO.1-279  
"MORLTM", " 1-281", "A", "NO.1-281  
"MORLTM", " 1-284", "A", "NO.1-284  
"MORLTM", " 1-286", "A", "NO.1-286  
"MORLTM", " 1-287", "A", "NO.1-287  
"MORLTM", " 1-288", "A", "NO.1-288  
"MORLTM", " 1-290", "A", "NO.1-290  
"MORLTM", " 1-291", "A", "NO.1-291  
"MORLTM", " 1-294", "A", "NO.1-294  
"MORLTM", " 1-296", "A", "NO.1-296  
"MORLTM", " 1-297", "A", "NO.1-297  
"MORLTM", " 1-300", "A", "NO.1-300  
"MORLTM", " 1-301", "A", "NO.1-301  
"MORLTM", " 1-304", "A", "NO.1-304  
"MORLTM", " 1-305", "A", "NO.1-305  
"MORLTM", " 1-306", "A", "NO.1-306  
"MORLTM", " 1-307", "A", "NO.1-307  
"MORLTM", " 1-309", "A", "NO.1-309  
"MORLTM", " 1-310", "A", "NO.1-310  
"MORLTM", " 1-311", "A", "NO.1-311  
"MORLTM", " 1-312", "A", "NO.1-312  
"MORLTM", " 1-314", "A", "NO.1-314

", "L3", 58, 10, 31, 32, 31, 38, 41, 40, 13, 12, 13, 18, 18, 20  
", "L3", 59, 10, 25, 21, 21, 33, 32, 33, 12, 11, 10, 15, 16, 17  
", "L3", 120, 10, 15, 16, 20, 28, 28, 27, 8, 8, 9, 14, 13, 15  
", "L3", 59, 10, 29, 28, 27, 35, 35, 35, 13, 13, 11, 16, 18, 18  
", "L3", 59, 10, 22, 24, 26, 30, 32, 33, 12, 11, 10, 14, 16, 20  
", "L3", 60, 10, 26, 22, 21, 35, 33, 33, 8, 8, 11, 18, 15, 16  
", "L3", 116, 10, 16, 20, 22, 29, 28, 28, 9, 7, 10, 15, 15, 14  
", "L3", 58, 10, 30, 28, 29, 36, 36, 36, 14, 13, 12, 18, 20, 17  
", "L3", 59, 10, 23, 28, 24, 35, 38, 36, 14, 10, 13, 18, 17, 17  
", "L3", 58, 10, 20, 27, 27, 37, 36, 38, 12, 12, 12, 19, 17, 20  
", "L3", 59, 10, 28, 25, 26, 30, 30, 31, 12, 10, 12, 14, 15, 13  
", "L3", 120, 10, 21, 16, 18, 28, 27, 28, 12, 10, 8, 15, 15, 14  
", "L3", 60, 10, 18, 31, 21, 31, 27, 32, 9, 11, 8, 15, 15, 15  
", "L3", 58, 10, 27, 27, 30, 30, 32, 31, 10, 12, 10, 12, 17, 16  
", "L3", 110, 10, 20, 22, 23, 27, 30, 28, 11, 10, 11, 14, 15, 15  
", "L3", 59, 10, 30, 32, 28, 36, 38, 35, 12, 13, 13, 18, 20, 22  
", "L3", 108, 10, 16, 23, 22, 30, 29, 29, 9, 8, 11, 16, 14, 13  
", "L3", 109, 10, 22, 23, 22, 27, 27, 28, 9, 9, 9, 13, 13, 13  
", "L3", 111, 10, 25, 23, 21, 25, 25, 26, 10, 9, 10, 13, 12, 13  
", "L3", 113, 10, 22, 23, 23, 28, 27, 26, 10, 9, 10, 14, 14, 15  
", "L3", 111, 10, 23, 19, 21, 31, 29, 31, 10, 9, 10, 16, 15, 16  
", "L3", 58, 10, 22, 19, 26, 34, 36, 34, 14, 13, 10, 17, 18, 17  
", "L3", 57, 10, 21, 24, 22, 33, 33, 32, 12, 10, 12, 17, 15, 17  
", "L3", 60, 10, 30, 23, 32, 37, 35, 35, 14, 13, 13, 19, 20, 17  
", "L3", 58, 10, 20, 28, 26, 35, 36, 37, 11, 12, 12, 18, 17, 20  
", "L3", 59, 10, 30, 26, 21, 30, 35, 32, 12, 11, 12, 13, 17, 18  
", "L3", 59, 10, 27, 31, 31, 37, 35, 36, 12, 11, 13, 23, 15, 18  
", "L3", 119, 10, 17, 19, 18, 25, 25, 25, 10, 10, 7, 11, 14, 13  
", "L3", 58, 10, 34, 33, 25, 40, 39, 41, 12, 10, 14, 22, 17, 21  
", "L3", 60, 10, 30, 26, 29, 31, 33, 33, 12, 8, 10, 15, 16, 15  
", "L3", 59, 10, 18, 21, 22, 28, 28, 31, 10, 8, 11, 14, 15, 14  
", "L3", 110, 10, 20, 22, 22, 30, 27, 30, 10, 10, 10, 16, 13, 16  
", "L3", 97, 10, 21, 22, 26, 35, 34, 31, 11, 11, 11, 17, 16, 16  
", "L3", 58, 10, 27, 27, 26, 33, 31, 31, 11, 12, 12, 14, 15, 16  
", "L3", 119, 10, 21, 20, 20, 32, 31, 32, 13, 11, 9, 15, 16, 14  
", "L3", 59, 10, 25, 25, 22, 29, 28, 30, 11, 10, 11, 13, 15, 14  
", "L3", 58, 10, 29, 27, 27, 33, 34, 34, 13, 12, 11, 17, 17, 17  
", "L3", 117, 10, 18, 18, 21, 23, 23, 22, 7, 7, 7, 11, 11, 11  
", "L3", 120, 10, 19, 18, 18, 23, 22, 23, 10, 8, 9, 11, 11, 11  
", "L3", 59, 10, 23, 26, 25, 28, 27, 28, 9, 10, 9, 14, 13, 14  
", "L3", 59, 10, 23, 25, 25, 37, 37, 38, 11, 11, 10, 18, 18, 19  
", "L3", 119, 10, 14, 16, 18, 29, 27, 26, 11, 8, 9, 15, 15, 11  
", "L3", 107, 10, 21, 26, 26, 30, 30, 31, 12, 11, 10, 15, 17, 16  
", "L3", 60, 10, 23, 25, 26, 35, 33, 33, 13, 10, 12, 16, 18, 15  
", "L3", 119, 10, 23, 22, 23, 29, 29, 29, 10, 11, 10, 15, 14, 15  
", "L3", 110, 10, 24, 21, 25, 29, 30, 31, 10, 10, 11, 15, 14, 14  
", "L3", 60, 10, 21, 27, 29, 30, 31, 31, 10, 10, 11, 14, 15, 14  
", "L3", 60, 10, 28, 28, 28, 37, 36, 37, 10, 11, 12, 18, 16, 19  
", "L3", 102, 10, 24, 24, 23, 25, 25, 24, 8, 8, 8, 13, 12, 13  
", "L3", 59, 10, 28, 21, 32, 36, 34, 33, 11, 11, 10, 16, 17, 18  
", "L3", 59, 10, 32, 31, 32, 39, 37, 38, 17, 15, 14, 18, 18, 21  
", "L3", 120, 10, 15, 16, 16, 18, 17, 18, 7, 7, 6, 8, 8, 9  
", "L3", 112, 10, 20, 24, 18, 26, 23, 23, 8, 7, 7, 12, 12, 12  
", "L3", 118, 10, 16, 14, 12, 20, 22, 21, 8, 8, 7, 10, 12, 12  
", "L3", 118, 10, 22, 22, 19, 24, 22, 22, 8, 7, 6, 11, 11, 10  
", "L3", 58, 10, 25, 26, 27, 27, 27, 29, 10, 10, 10, 12, 13, 15  
", "L3", 115, 10, 20, 22, 21, 26, 24, 25, 8, 6, 6, 12, 13, 12  
", "L3", 102, 10, 20, 19, 22, 33, 36, 35, 14, 12, 11, 16, 19, 18

"MORLTM", " 1-316", "A", "NO. 1-316  
"MORLTM", " 1-319", "A", "NO. 1-319  
"MORLTM", " 1-318", "A", "NO. 1-318  
"MORLTM", " 1-320", "A", "NO. 1-320  
"MORLTM", " 1-323", "A", "NO. 1-323  
"MORLTM", " 1-326", "A", "NO. 1-326  
"MORLTM", " 1-327", "A", "NO. 1-327  
"MORLTM", " 1-329", "A", "NO. 1-329  
"MORLTM", " 1-330", "A", "NO. 1-330  
"MORLTM", " 1-332", "A", "NO. 1-332  
"MORLTM", " 1-333", "A", "NO. 1-333  
"MORLTM", " 1-334", "A", "NO. 1-334  
"MORLTM", " 1-336", "A", "NO. 1-336  
"MORLTM", " 1-337", "A", "NO. 1-337  
"MORLTM", " 1-338", "A", "NO. 1-338  
"MORLTM", " 1-341", "A", "NO. 1-341  
"MORLTM", " 1-342", "A", "NO. 1-342  
"MORLTM", " 1-343", "A", "NO. 1-343  
"MORLTM", " 1-345", "A", "NO. 1-345  
"MORLTM", " 1-348", "A", "NO. 1-348  
"MORLTM", " 1-349", "A", "no. 1-349  
"MORLTM", " 1-351", "A", "NO. 1-351  
"MORLTM", " 1-452", "A", "NO. 1-452  
"MORLTM", " 1-457", "A", "NO. 1-457  
"MORLTM", " 1-464", "A", "NO. 1-464  
"MORLTM", " 1-468", "A", "NO. 1-468  
"MORLTM", " 1-473", "A", "NO. 1-473  
"MORLTM", " 1-478", "A", "NO. 1-478  
"MORLTM", " 1-480", "A", "NO. 1-480  
"MORLTM", " 1-484", "A", "NO. 1-484  
"MORLTM", " 1-487", "A", "NO. 1-487  
"MORLTM", " 1-493", "A", "NO. 1-493  
"MORLTM", " 1-495", "A", "NO. 1-495  
"MORLTM", " 1-500", "A", "NO. 1-500  
"MORLTM", " 1-501", "A", "NO. 1-501  
"MORLTM", " 3-835", "C", "NO. 3-835  
"MORLTM", " 3-837", "C", "NO. 3-837  
"MORLTM", " 3-842", "C", "NO. 3-842  
"MORLTM", " 3-847", "C", "NO. 3-847  
"MORLTM", " 3-848", "C", "NO. 3-848  
"MORLTM", " 3-850", "C", "NO. 3-850  
"MORLTM", " 3-853", "C", "NO. 3-853  
"MORLTM", " 3-858", "C", "NO. 3-858  
"MORLTM", " 3-859", "C", "NO. 3-859  
"MORLTM", " 3-861", "C", "NO. 3-861  
"MORLTM", " 3-862", "C", "NO. 3-862  
"MORLTM", " 3-864", "C", "NO. 3-864  
"MORLTM", " 3-872", "C", "NO. 3-872  
"MORLTM", " 3-875", "C", "NO. 3-875  
"MORLTM", " 3-876", "C", "NO. 3-876  
"MORLTM", " 3-877", "C", "NO. 3-877  
"MORLTM", " 3-878", "C", "NO. 3-878  
"MORLTM", " 1-322", "A", "NO. 1-322  
"MORLTM", " 1-492", "A", "NO. 1-492  
"MORLTM", " 1-497", "A", "NO. 1-497  
"MORLTM", " 3-879", "C", "NO. 3-879  
"MORLTM", " 3-881", "C", "NO. 3-881  
"MORLTM", " 3-882", "C", "NO. 3-882

", "L3", 119, 10, 13, 15, 16, 19, 18, 19, 7, 6, 5, 7, 9, 9  
", "L3", 59, 10, 28, 25, 23, 29, 31, 28, 8, 8, 8, 14, 16, 14  
", "L3", 105, 10, 18, 21, 20, 35, 36, 35, 12, 14, 14, 17, 16, 18  
", "L3", 120, 10, 14, 16, 18, 26, 25, 26, 9, 10, 8, 12, 15, 11  
", "L3", 110, 10, 20, 19, 19, 26, 27, 28, 10, 10, 9, 12, 13, 14  
", "L3", 106, 10, 15, 17, 17, 37, 38, 37, 14, 14, 13, 16, 19, 20  
", "L3", 113, 10, 21, 21, 19, 28, 29, 29, 9, 11, 11, 15, 13, 16  
", "L3", 87, 10, 20, 23, 23, 30, 29, 29, 10, 10, 9, 14, 16, 13  
", "L3", 111, 10, 21, 22, 23, 26, 27, 28, 11, 8, 8, 12, 14, 14  
", "L3", 107, 10, 18, 21, 24, 26, 27, 25, 7, 7, 9, 12, 12, 13  
", "L3", 110, 10, 21, 24, 21, 25, 24, 24, 9, 6, 7, 13, 14, 11  
", "L3", 60, 10, 25, 32, 31, 35, 34, 36, 12, 12, 10, 19, 17, 19  
", "L3", 58, 10, 22, 22, 23, 32, 31, 32, 12, 12, 13, 18, 16, 15  
", "L3", 110, 10, 22, 24, 18, 25, 25, 25, 8, 7, 7, 13, 12, 12  
", "L3", 62, 10, 21, 24, 25, 29, 29, 28, 11, 11, 10, 16, 16, 14  
", "L3", 96, 10, 21, 29, 22, 26, 26, 27, 8, 7, 8, 13, 12, 13  
", "L3", 108, 10, 28, 20, 24, 27, 26, 27, 8, 7, 8, 12, 12, 12  
", "L3", 117, 10, 21, 19, 20, 28, 28, 29, 10, 12, 10, 14, 14, 14  
", "L3", 112, 10, 23, 22, 21, 32, 29, 31, 10, 12, 10, 17, 14, 17  
", "L3", 56, 10, 27, 33, 31, 40, 40, 41, 15, 15, 13, 17, 22, 20  
", "L3", 104, 10, 22, 24, 25, 29, 28, 27, 9, 9, 9, 14, 13, 12  
", "L3", 111, 10, 22, 23, 20, 27, 27, 27, 10, 9, 8, 14, 15, 12  
", "L3", 61, 10, 28, 29, 28, 33, 32, 33, 12, 11, 12, 17, 16, 17  
", "L3", 107, 10, 24, 25, 25, 22, 22, 22, 7, 6, 8, 11, 11, 11  
", "L3", 109, 10, 24, 22, 23, 25, 24, 24, 10, 8, 11, 13, 11, 12  
", "L3", 90, 10, 18, 24, 28, 36, 37, 35, 16, 12, 14, 21, 19, 15  
", "L3", 92, 10, 25, 27, 25, 24, 25, 25, 9, 9, 10, 10, 12, 14  
", "L3", 58, 10, 27, 27, 26, 37, 33, 34, 10, 12, 12, 19, 14, 19  
", "L3", 93, 10, 23, 25, 22, 29, 28, 30, 11, 9, 9, 13, 16, 15  
", "L3", 119, 10, 11, 12, 13, 18, 18, 18, 5, 7, 8, 9, 7, 9  
", "L3", 119, 10, 18, 17, 17, 27, 28, 25, 7, 7, 7, 13, 15, 11  
", "L3", 119, 10, 21, 21, 20, 29, 30, 32, 10, 10, 9, 13, 15, 15  
", "L3", 58, 10, 24, 22, 26, 31, 31, 30, 11, 11, 10, 14, 15, 16  
", "L3", 59, 10, 24, 23, 25, 36, 32, 34, 11, 12, 11, 19, 18, 17  
", "L3", 89, 10, 24, 30, 29, 32, 31, 32, 11, 10, 11, 15, 16, 15  
", "L2", 72, 10, 29, 31, 30, 43, 44, 43, 14, 18, 17, 20, 19, 22  
", "L2", 61, 10, 36, 32, 38, 42, 41, 42, 14, 14, 15, 22, 21, 22  
", "L2", 70, 10, 20, 21, 21, 27, 26, 28, 10, 9, 9, 13, 14, 13  
", "L2", 69, 10, 31, 32, 26, 35, 36, 37, 10, 13, 12, 18, 18, 19  
", "L2", 72, 10, 23, 30, 26, 29, 33, 30, 12, 9, 10, 16, 17, 16  
", "L2", 71, 10, 27, 27, 27, 39, 40, 39, 13, 11, 10, 19, 22, 19  
", "L2", 68, 10, 27, 26, 28, 45, 45, 46, 16, 14, 16, 21, 22, 22  
", "L2", 72, 10, 22, 25, 22, 30, 28, 30, 11, 10, 11, 15, 14, 15  
", "L2", 74, 10, 22, 20, 23, 31, 30, 32, 12, 11, 8, 15, 17, 16  
", "L2", 69, 10, 18, 19, 23, 26, 28, 30, 7, 9, 10, 13, 12, 16  
", "L2", 72, 10, 40, 39, 30, 28, 30, 29, 8, 9, 8, 13, 14, 15  
", "L2", 69, 10, 27, 27, 32, 35, 36, 37, 13, 14, 11, 16, 19, 20  
", "L2", 69, 10, 31, 25, 26, 31, 31, 30, 10, 10, 8, 16, 16, 15  
", "L2", 70, 10, 26, 26, 27, 37, 33, 36, 11, 12, 12, 20, 16, 18  
", "L2", 70, 10, 27, 24, 23, 35, 33, 32, 11, 12, 12, 19, 17, 16  
", "L2", 70, 10, 27, 28, 25, 31, 30, 33, 11, 10, 10, 15, 17, 15  
", "L2", 69, 10, 24, 22, 27, 35, 32, 33, 11, 11, 13, 17, 15, 16  
", "L3", 35, 10, 45, 49, 45, 74, 72, 71, 26, 24, 29, 38, 38, 34  
", "L3", 80, 10, 22, 27, 26, 30, 30, 31, 10, 10, 8, 15, 16, 14  
", "L3", 62, 10, 23, 21, 26, 28, 29, 29, 10, 7, 11, 14, 13, 12  
", "L2", 73, 10, 23, 16, 19, 23, 23, 24, 8, 7, 9, 13, 11, 14  
", "L3", 71, 10, 28, 26, 25, 36, 39, 37, 12, 11, 12, 20, 18, 20  
", "L2", 69, 10, 27, 29, 29, 44, 41, 41, 16, 14, 16, 22, 20, 19

"MORLTM", " 3-883", "C", "NO. 3-883  
 "MORLTM", " 3-884", "C", "NO. 3-884  
 "MORLTM", " 3-886", "C", "NO. 3-886  
 "MORLTM", " 3-887", "C", "NO. 3-887  
 "MORLTM", " 3-888", "C", "NO. 3-888  
 "MORLTM", " 3-893", "C", "NO. 3-893  
 "MORLTM", " 3-895", "C", "NO. 3-895  
 "MORLTM", " 3-896", "C", "NO. 3-896  
 "MORLTM", " 3-897", "C", "NO. 3-897  
 "MORLTM", " 3-898", "C", "NO. 3-898  
 "MORLTM", " 3-900", "C", "NO. 3-900  
 "MORLTM", " 4-129", "A", "NO. 4-129  
 "MORLTM", " 4-131", "A", "NO. 4-131  
 "MORLTM", " 4-134", "A", "NO. 4-134  
 "MORLTM", " 4-137", "A", "NO. 4-137  
 "MORLTM", " 4-142", "A", "NO. 4-142  
 "MORLTM", " 4-146", "A", "NO. 4-146  
 "MORLTM", "TRI-572", "C", "NO. TRI-572  
 "MORLTM", "TRI-572", "C", "NO. TRI-572  
 "MORLTM", "TRI-579", "C", "NO. TRI-579  
 "MORLTM", "TRI-581", "C", "NO. TRI-581  
 "MORLTM", "TRI-586", "C", "NO. TRI-586  
 "MORLTM", "TRI-588", "C", "NO. TRI-588  
 "MORLTM", "TRI-597", "C", "NO. TRI-597  
 "MORLTM", "TRI-600", "C", "NO. TRI-600  
 "MORLTM", "TRI-601", "C", "NO. TRI-601  
 "MORLTM", "TRI-605", "C", "NO. TRI-605  
 "MORLTM", "TRI-607", "C", "NO. TRI-607  
 "MORLTM", "TRI-614", "C", "NO. TRI-614  
 "MORLTM", "TRI-616", "C", "NO. TRI-616  
 "MORLTM", "TRI-617", "C", "NO. TRI-617  
 "MORLTM", "TRI-618", "C", "NO. TRI-618  
 "MORLTM", "TRI-627", "C", "NO. TRI-627  
 "MORLTM", "TRI-632", "C", "NO. TRI-632  
 "MORLTM", "TRI-659", "C", "NO. TRI-659  
 "MORLTM", "TRI-662", "C", "NO. TRI-662  
 "MORLTM", "TRI-672", "C", "NO. TRI-672  
 "MORLTM", "TRI-675", "C", "NO. TRI-675  
 "MORLTM", "TRI-678", "C", "NO. TRI-678  
 "MORLTM", "TRI-681", "C", "NO. TRI-681  
 "MORLTM", "TRI-698", "C", "NO. TRI-698  
 "MORLTM", "TRI-699", "C", "NO. TRI-699  
 "MORLTM", "TRI-711", "C", "NO. TRI-711  
 "MORLTM", "TRI-713", "C", "NO. TRI-713  
 "MORLTM", "TRI-720", "C", "NO. TRI-720  
 "MORLTM", "TRI-721", "C", "NO. TRI-721  
 "MORLTM", "TRI-728", "C", "NO. TRI-728 PERFECT  
 "MORLTM", "TRI-734", "C", "NO. TRI-734 PERFECT  
 "MORLTM", "TRI-736", "C", "NO. TRI-736  
 "MORLTM", "TRI-737", "C", "NO. TRI-737  
 "MORLTM", "TRI-743", "C", "NO. TRI-743  
 "MORLTM", "TRI-745", "C", "NO. TRI-745  
 "MORLTM", "TRI-747", "C", "NO. TRI-747  
 "MORLTM", "TRI-754", "C", "NO. TRI-754 PERFECT  
 "MORLTM", "TRI-757", "C", "NO. TRI-757  
 "MORLTM", "TRI-775", "C", "NO. TRI-775  
 "MORLTM", "TRI-776", "C", "NO. TRI-776  
 "MORLTM", "TRI-777", "C", "NO. TRI-777

", "L2", 72, 10, 31, 29, 32, 30, 30, 30, 8, 8, 9, 15, 14, 15  
 ", "L3", 72, 10, 23, 17, 21, 30, 31, 32, 11, 9, 11, 15, 16, 17  
 ", "L2", 72, 10, 26, 31, 33, 36, 33, 34, 8, 9, 10, 17, 15, 18  
 ", "L2", 69, 10, 30, 25, 32, 45, 45, 43, 15, 17, 15, 22, 21, 21  
 ", "L2", 69, 10, 28, 32, 29, 34, 35, 37, 12, 12, 12, 15, 17, 17  
 ", "L2", 75, 10, 29, 31, 30, 33, 33, 32, 13, 9, 11, 15, 18, 15  
 ", "L2", 73, 10, 34, 35, 44, 38, 37, 37, 12, 16, 13, 19, 20, 18  
 ", "L2", 71, 10, 20, 23, 27, 26, 26, 26, 7, 9, 8, 12, 12, 15  
 ", "L2", 69, 10, 26, 33, 30, 29, 33, 32, 8, 10, 7, 12, 16, 17  
 ", "L2", 69, 10, 16, 23, 21, 40, 43, 42, 15, 16, 16, 17, 20, 22  
 ", "L2", 69, 10, 16, 11, 11, 28, 24, 30, 7, 9, 10, 13, 10, 15  
 ", "L3", 58, 10, 22, 24, 22, 32, 33, 31, 12, 11, 9, 14, 18, 14  
 ", "L3", 58, 10, 36, 30, 32, 34, 35, 35, 11, 13, 12, 16, 16, 19  
 ", "L3", 118, 10, 24, 20, 26, 27, 25, 27, 10, 9, 9, 11, 13, 12  
 ", "L3", 59, 10, 35, 39, 33, 49, 49, 47, 15, 16, 15, 22, 27, 24  
 ", "L3", 119, 10, 17, 15, 15, 22, 22, 23, 9, 8, 8, 12, 12, 12  
 ", "L3", 117, 10, 13, 13, 14, 19, 19, 19, 7, 8, 7, 8, 8, 10  
 ", "L2", 70, 10, 33, 31, 30, 30, 32, 30, 12, 8, 10, 17, 17, 16  
 ", "L2", 70, 10, 32, 32, 30, 31, 31, 30, 11, 8, 11, 17, 17, 16  
 ", "L2", 71, 10, 28, 30, 30, 38, 36, 37, 12, 12, 15, 18, 16, 16  
 ", "L2", 70, 10, 19, 18, 20, 26, 26, 25, 8, 10, 11, 11, 13, 12  
 ", "L2", 70, 10, 25, 33, 29, 40, 40, 42, 14, 14, 14, 21, 20, 20  
 ", "L2", 71, 10, 19, 21, 21, 32, 29, 30, 12, 11, 10, 16, 14, 15  
 ", "L2", 69, 10, 18, 19, 16, 22, 22, 22, 9, 8, 5, 11, 13, 12  
 ", "L2", 71, 10, 22, 25, 17, 25, 24, 24, 8, 7, 8, 12, 12, 13  
 ", "L2", 70, 10, 29, 21, 24, 37, 36, 37, 11, 11, 15, 20, 16, 20  
 ", "L2", 71, 10, 30, 33, 34, 40, 41, 41, 14, 14, 12, 21, 22, 21  
 ", "L2", 71, 10, 26, 32, 28, 33, 34, 38, 12, 11, 9, 16, 19, 19  
 ", "L2", 71, 10, 28, 29, 30, 32, 32, 30, 12, 10, 12, 15, 15, 13  
 ", "L2", 70, 10, 27, 29, 23, 37, 37, 36, 13, 14, 14, 19, 18, 20  
 ", "L2", 71, 10, 24, 27, 25, 40, 41, 36, 11, 16, 14, 17, 21, 23  
 ", "L2", 73, 10, 27, 27, 28, 32, 33, 33, 10, 9, 11, 16, 15, 17  
 ", "L2", 70, 10, 28, 29, 25, 42, 42, 43, 14, 15, 13, 18, 20, 23  
 ", "L2", 69, 10, 26, 29, 23, 29, 31, 30, 11, 8, 8, 15, 16, 16  
 ", "L2", 71, 10, 27, 25, 27, 39, 39, 37, 12, 12, 13, 22, 20, 17  
 ", "L2", 71, 10, 25, 25, 25, 49, 49, 47, 16, 16, 19, 25, 23, 22  
 ", "L2", 66, 10, 35, 36, 30, 43, 44, 42, 16, 14, 15, 23, 24, 21  
 ", "L2", 72, 10, 21, 23, 22, 35, 37, 37, 14, 11, 12, 19, 19, 16  
 ", "L2", 67, 10, 37, 39, 37, 47, 43, 47, 13, 16, 16, 24, 21, 24  
 ", "L2", 70, 10, 25, 26, 25, 35, 36, 37, 13, 12, 9, 16, 17, 19  
 ", "L2", 71, 10, 23, 24, 23, 36, 38, 36, 12, 12, 15, 20, 19, 19  
 ", "L2", 71, 10, 22, 21, 23, 34, 33, 33, 12, 10, 12, 19, 17, 17  
 ", "L2", 72, 10, 25, 28, 26, 32, 35, 35, 11, 11, 10, 16, 17, 18  
 ", "L2", 71, 10, 20, 16, 20, 21, 22, 24, 9, 8, 6, 10, 13, 12  
 ", "L2", 74, 10, 22, 21, 24, 24, 23, 24, 6, 8, 8, 9, 11, 12  
 ", "L2", 67, 10, 29, 26, 28, 38, 34, 36, 10, 13, 13, 18, 16, 21  
 ", "L2", 65, 10, 37, 38, 36, 46, 43, 46, 15, 14, 16, 24, 21, 23  
 ", "L2", 71, 10, 25, 31, 31, 38, 41, 37, 13, 9, 12, 19, 21, 17  
 ", "L2", 70, 10, 21, 28, 29, 37, 42, 39, 14, 13, 15, 20, 19, 19  
 ", "L2", 69, 10, 26, 26, 28, 29, 30, 30, 10, 9, 9, 13, 16, 14  
 ", "L2", 71, 10, 24, 33, 37, 38, 39, 37, 16, 12, 14, 20, 20, 18  
 ", "L2", 72, 10, 25, 26, 26, 29, 28, 27, 10, 10, 9, 13, 16, 15  
 ", "L2", 70, 10, 28, 27, 26, 36, 34, 37, 14, 11, 12, 19, 19, 17  
 ", "L2", 72, 10, 19, 21, 22, 33, 30, 31, 10, 11, 11, 15, 15, 16  
 ", "L2", 72, 10, 15, 18, 22, 26, 28, 26, 10, 8, 11, 14, 14, 13  
 ", "L2", 71, 10, 26, 27, 30, 35, 34, 34, 12, 12, 11, 17, 17, 18  
 ", "L2", 71, 10, 18, 21, 20, 30, 29, 31, 11, 8, 12, 13, 14, 15  
 ", "L2", 72, 10, 19, 20, 25, 35, 35, 32, 9, 11, 13, 17, 16, 17

"MORLTM", "TRI -773", "C", "NO. TRI -773  
"MORLTM", "TRI -782", "C", "NO. TRI -782  
"MORLTM", "TRI -795", "C", "NO. TRI -795  
"MORLTM", "TRI -799", "C", "NO. TRI -799  
"MORLTM", "TRI -803", "C", "NO. TRI -803  
"MORLTM", "TRI -803", "C", "NO. TRI -807  
"MORLTM", "TRI -811", "C", "NO. TRI -811  
"MORLTM", "TRI -821", "C", "NO. TRI -821  
"MORLTM", "TRI -822", "C", "NO. TRI -822  
"MORLTM", "TRI -823", "C", "NO. TRI -823  
"MORLTM", "TRI -827", "C", "NO. TRI -827  
"MORLTM", "X- 2", "C", "NO. X-002  
"MORLTM", "X- 5", "C", "NO. X-005  
"MORLTM", "X- 6", "C", "NO. X-006  
"MORLTM", "X- 7", "C", "NO. X-007  
"MORLTM", "X- 8", "C", "NO. X-008  
"MORLTM", "X- 13", "C", "NO. X-013  
"MORLTM", "X- 14", "C", "NO. X-014  
"MORLTM", "X- 15", "C", "NO. X-015  
"MORLTM", "X- 16", "C", "NO. X-016  
"MORLTM", "X-352", "C", "NO. X-352  
"MORLTM", "X-353", "C", "NO. X-353  
"MORLTM", "X-357", "C", "NO. X-357  
"MORLTM", "X-358", "C", "NO. X-358  
"MORLTM", "X-360", "C", "NO. X-360  
"MORLTM", "X-363", "C", "NO. X-363  
"MORLTM", "X-366", "C", "NO. X-366  
"MORLTM", "X-367", "C", "NO. X-367  
"MORLTM", "X-368", "C", "NO. X-368  
"MORLTM", "X-369", "C", "NO. X-369  
"MORLTM", "X-380", "C", "NO. X-380  
"MORLTM", "X-382", "C", "NO. X-382  
"MORLTM", "X-383", "C", "NO. X-383  
"MORLTM", "X-385", "C", "NO. X-385  
"MORLTM", "X-389", "C", "NO. X-389  
"MORLTM", "X-391", "C", "NO. X-391  
"MORLTM", "X-392", "C", "NO. X-392  
"MORLTM", "X-395", "C", "NO. X-395  
"MORLTM", "X-396", "C", "NO. X-396  
"MORLTM", "X-399", "C", "NO. X-399  
"MORLTM", "X-403", "C", "NO. X-403  
"MORLTM", "X-406", "C", "NO. X-406  
"MORLTM", "X-407", "C", "NO. X-407  
"MORLTM", "X-408", "C", "NO. X-408  
"MORLTM", "X-411", "C", "NO. X-411  
"MORLTM", "X-412", "C", "NO. X-412  
"MORLTM", "X-413", "C", "NO. X-413  
"MORLTM", "X-415", "C", "NO. X-415  
"MORLTM", "X-416", "C", "NO. X-416  
"MORLTM", "X-417", "C", "NO. X-417  
"MORLTM", "X-419", "C", "NO. X-419  
"MORLTM", "X-429", "C", "NO. X-429  
"MORLTM", "X-431", "C", "NO. X-431  
"MORLTM", "X-435", "C", "NO. X-435  
"MORLTM", "X-503", "C", "NO. X-503  
"MORLTM", "X-513", "C", "NO. X-513  
"MORLTM", "X-516", "C", "NO. X-516  
"MORLTM", "X-517", "C", "NO. X-517

VERY LONG SPINE

", "L2", 71, 10, 20, 30, 27, 38, 37, 39, 13, 10, 12, 20, 19, 21  
", "L2", 69, 10, 27, 30, 30, 37, 36, 36, 11, 13, 11, 16, 17, 19  
", "L2", 70, 10, 21, 18, 22, 26, 26, 28, 10, 8, 8, 11, 13, 15  
", "L2", 70, 10, 25, 26, 27, 37, 36, 35, 11, 12, 14, 19, 16, 18  
", "L2", 71, 10, 20, 15, 21, 22, 20, 24, 9, 8, 6, 11, 12, 12  
", "L2", 71, 10, 24, 26, 26, 32, 36, 36, 12, 11, 10, 17, 17, 19  
", "L2", 68, 10, 23, 23, 23, 31, 31, 30, 10, 10, 10, 17, 16, 16  
", "L2", 71, 10, 19, 22, 21, 37, 38, 37, 14, 12, 13, 18, 20, 19  
", "L2", 72, 10, 28, 21, 29, 38, 38, 34, 11, 11, 10, 16, 21, 17  
", "L2", 71, 10, 29, 33, 34, 35, 34, 34, 14, 13, 12, 15, 17, 16  
", "L2", 72, 10, 28, 27, 27, 40, 40, 40, 12, 16, 15, 19, 17, 20  
", "L2", 71, 10, 15, 19, 16, 21, 21, 20, 9, 7, 6, 11, 12, 10  
", "L2", 71, 10, 26, 33, 29, 29, 30, 28, 8, 11, 9, 14, 15, 16  
", "L2", 72, 10, 23, 25, 28, 34, 35, 32, 11, 10, 12, 16, 17, 15  
", "L2", 72, 10, 13, 15, 14, 23, 25, 23, 8, 8, 10, 12, 12, 9  
", "L2", 72, 10, 28, 28, 28, 34, 35, 36, 14, 13, 12, 17, 18, 20  
", "L2", 69, 10, 27, 28, 27, 38, 34, 38, 13, 11, 10, 19, 18, 17  
", "L2", 72, 10, 30, 32, 35, 36, 30, 35, 14, 12, 12, 16, 15, 19  
", "L2", 71, 10, 26, 25, 23, 36, 36, 37, 12, 15, 13, 18, 19, 21  
", "L2", 69, 10, 20, 25, 25, 42, 36, 37, 12, 11, 12, 24, 20, 15  
", "L2", 73, 10, 30, 27, 30, 39, 38, 39, 13, 10, 13, 21, 19, 17  
", "L2", 72, 10, 29, 32, 23, 38, 39, 37, 12, 13, 11, 18, 21, 20  
", "L2", 72, 10, 27, 27, 28, 35, 36, 37, 13, 13, 13, 18, 18, 19  
", "L2", 71, 10, 26, 26, 26, 37, 30, 36, 13, 11, 10, 16, 15, 17  
", "L2", 72, 10, 24, 23, 24, 28, 25, 25, 7, 8, 9, 15, 12, 12  
", "L2", 72, 10, 26, 21, 20, 36, 33, 33, 10, 13, 11, 16, 16, 18  
", "L2", 73, 10, 28, 24, 28, 37, 39, 37, 14, 10, 10, 18, 21, 17  
", "L2", 71, 10, 30, 34, 29, 28, 27, 29, 9, 9, 8, 15, 14, 16  
", "L2", 73, 10, 26, 25, 25, 37, 36, 33, 11, 10, 12, 19, 18, 16  
", "L2", 72, 10, 29, 34, 32, 34, 32, 33, 12, 12, 12, 18, 17, 17  
", "L2", 72, 10, 26, 26, 27, 41, 42, 41, 14, 13, 14, 19, 19, 19  
", "L2", 72, 10, 24, 27, 23, 29, 26, 29, 11, 12, 9, 14, 15, 16  
", "L2", 72, 10, 14, 15, 15, 26, 23, 27, 8, 8, 8, 14, 12, 13  
", "L2", 72, 10, 23, 17, 20, 29, 31, 30, 11, 9, 11, 14, 15, 13  
", "L2", 72, 10, 28, 25, 28, 40, 40, 39, 15, 13, 14, 19, 21, 19  
", "L2", 72, 10, 20, 26, 21, 33, 33, 32, 12, 11, 9, 16, 18, 17  
", "L2", 71, 10, 28, 31, 29, 35, 36, 35, 14, 11, 13, 16, 18, 16  
", "L2", 71, 10, 30, 28, 30, 40, 39, 34, 11, 12, 14, 17, 19, 16  
", "L2", 71, 10, 28, 31, 27, 36, 36, 35, 9, 11, 12, 18, 17, 19  
", "L2", 73, 10, 24, 23, 23, 29, 28, 28, 11, 13, 8, 14, 17, 16  
", "L2", 72, 10, 32, 32, 24, 34, 33, 31, 11, 8, 9, 16, 18, 15  
", "L2", 71, 10, 28, 27, 29, 40, 41, 39, 13, 12, 13, 19, 21, 18  
", "L2", 72, 10, 29, 25, 24, 37, 37, 36, 12, 11, 13, 19, 17, 17  
", "L2", 71, 10, 26, 27, 29, 39, 40, 38, 14, 11, 13, 19, 21, 18  
", "L2", 72, 10, 23, 25, 22, 40, 44, 43, 15, 16, 16, 21, 24, 24  
", "L2", 73, 10, 30, 32, 23, 34, 32, 31, 11, 8, 9, 16, 18, 15  
", "L2", 72, 10, 31, 32, 31, 37, 36, 39, 12, 11, 12, 19, 18, 20  
", "L2", 71, 10, 25, 30, 29, 38, 40, 39, 14, 9, 14, 19, 20, 19  
", "L2", 71, 10, 24, 28, 25, 36, 38, 36, 12, 11, 13, 19, 18, 16  
", "L2", 72, 10, 26, 26, 29, 39, 39, 37, 14, 11, 13, 18, 20, 17  
", "L2", 72, 10, 22, 23, 27, 28, 29, 27, 9, 8, 8, 15, 16, 13  
", "L2", 70, 10, 25, 28, 26, 31, 32, 33, 11, 11, 14, 16, 14, 16  
", "L2", 70, 10, 28, 27, 25, 34, 33, 36, 10, 11, 12, 17, 15, 19  
", "L2", 71, 10, 24, 27, 26, 29, 31, 33, 11, 10, 13, 16, 14, 16  
", "L2", 71, 10, 28, 30, 31, 33, 34, 37, 10, 11, 12, 18, 16, 21  
", "L2", 71, 10, 35, 33, 30, 41, 37, 39, 13, 14, 13, 21, 20, 19  
", "L2", 73, 10, 23, 24, 23, 32, 32, 34, 12, 9, 12, 17, 15, 14  
", "L2", 71, 10, 33, 31, 30, 34, 36, 34, 11, 11, 12, 17, 17, 17

"MORLTM", " X-518", "C", "NO.X-518  
 "MORLTM", " X-525", "C", "NO.X-525  
 "MORLTM", " X-527", "C", "NO.X-527  
 "MORLTM", " X-533", "C", "NO.X-533  
 "MORLTM", " X-534", "C", "NO.X-534  
 "MORLTM", " X-535", "C", "NO.X-535  
 "MORLTM", " X-542", "C", "NO.X-542  
 "MORLTM", " X-544", "C", "NO.X-544  
 "MORLTM", " X-547", "C", "NO.X-547  
 "MORLTM", " X-551", "C", "NO.X-551  
 "MORLTM", " X-551", "C", "NO.X-551  
 "MORLTM", " X-559", "C", "NO.X-559  
 "MORLTM", " X-560", "C", "NO.X-560  
 "MORLTM", " X-562", "C", "NO.X-562  
 "MORLTM", " X-563", "C", "NO.X-563  
 "MORLTM", " X-565", "C", "NO.X-565  
 "MORLTM", " X-568", "C", "NO.X-568  
 "MORLTM", " X-569", "C", "NO.X-569

", "L2", 72, 10, 25, 23, 26, 35, 33, 34, 12, 11, 11, 18, 17, 16  
 ", "L2", 71, 10, 23, 24, 22, 34, 33, 34, 14, 11, 12, 15, 19, 16  
 ", "L2", 69, 10, 27, 26, 24, 34, 32, 33, 9, 9, 10, 17, 16, 18  
 ", "L2", 71, 10, 26, 24, 23, 34, 32, 34, 15, 11, 12, 16, 18, 16  
 ", "L2", 72, 10, 16, 18, 16, 22, 19, 21, 8, 8, 8, 10, 10, 12  
 ", "L2", 71, 10, 23, 27, 28, 35, 38, 35, 11, 12, 13, 16, 17, 19  
 ", "L2", 72, 10, 24, 26, 26, 31, 32, 32, 10, 11, 11, 15, 16, 17  
 ", "L2", 72, 10, 25, 22, 26, 30, 31, 32, 10, 9, 10, 16, 13, 16  
 ", "L2", 72, 10, 23, 30, 24, 35, 32, 35, 10, 11, 12, 19, 13, 18  
 ", "L2", 71, 10, 17, 17, 14, 29, 32, 32, 11, 10, 12, 16, 16, 16  
 ", "L2", 69, 10, 31, 25, 24, 36, 35, 36, 13, 11, 12, 18, 18, 18  
 ", "L2", 69, 10, 25, 18, 21, 28, 28, 28, 9, 8, 10, 16, 13, 15  
 ", "L2", 71, 10, 17, 18, 20, 44, 43, 42, 15, 16, 14, 21, 22, 23  
 ", "L2", 68, 10, 28, 20, 20, 30, 30, 30, 9, 8, 11, 15, 14, 15  
 ", "L2", 69, 10, 23, 26, 25, 34, 32, 32, 11, 13, 13, 17, 15, 19  
 ", "L2", 68, 10, 24, 28, 25, 42, 42, 42, 18, 17, 15, 21, 24, 21  
 ", "L2", 69, 10, 20, 22, 19, 36, 38, 39, 12, 14, 13, 19, 16, 21  
 ", "L2", 69, 10, 26, 18, 19, 37, 35, 36, 14, 11, 12, 18, 19, 17
