# Supplementary material for: Morphometric analysis of early Eocene &lt;i&gt;Corbisema&lt;/i&gt; skeletons (Silicoflagellata) in Mors, Denmark
Source: Copernicus journal article supplement (doi:10.5194/jm-37-283-2018), 2018-02-07
Supplement: Supplementary file 1 [file jm-37-283-2018-supplement.zip › 2_SILICO_measure_data_short_spine.pdf]

2. *Corbisema apiculata* type (short spine type)

| Mors (MOR), Light microscope( LTM))                                     |                |          |                                 |   |                                                                                                            |  |  |  |  |  |  |  |  |  |  |  |  |  |  |  |  |  |  |  |  |  |
|-------------------------------------------------------------------------|----------------|----------|---------------------------------|---|------------------------------------------------------------------------------------------------------------|--|--|--|--|--|--|--|--|--|--|--|--|--|--|--|--|--|--|--|--|--|
| Slide No. (1, 3, 4, tri, and X) and specimen serial number              |                |          |                                 |   |                                                                                                            |  |  |  |  |  |  |  |  |  |  |  |  |  |  |  |  |  |  |  |  |  |
| Microscope objective lens (A:x10, and C:x40)                            |                |          |                                 |   |                                                                                                            |  |  |  |  |  |  |  |  |  |  |  |  |  |  |  |  |  |  |  |  |  |
| Specimen ID and observation comment or remark                           |                |          |                                 |   |                                                                                                            |  |  |  |  |  |  |  |  |  |  |  |  |  |  |  |  |  |  |  |  |  |
| Microscope type (L2:microscope Olympus BX40, L3:microscope Olympus BH2) |                |          |                                 |   |                                                                                                            |  |  |  |  |  |  |  |  |  |  |  |  |  |  |  |  |  |  |  |  |  |
| Scale (display dots) and length(um)                                     |                |          |                                 |   |                                                                                                            |  |  |  |  |  |  |  |  |  |  |  |  |  |  |  |  |  |  |  |  |  |
| Spine length(um)                                                        |                |          |                                 |   |                                                                                                            |  |  |  |  |  |  |  |  |  |  |  |  |  |  |  |  |  |  |  |  |  |
| No.1,2, 3                                                               |                |          |                                 |   |                                                                                                            |  |  |  |  |  |  |  |  |  |  |  |  |  |  |  |  |  |  |  |  |  |
| Basal side direct connect length(um)                                    |                |          |                                 |   |                                                                                                            |  |  |  |  |  |  |  |  |  |  |  |  |  |  |  |  |  |  |  |  |  |
| No.1,2, 3(clockwise)                                                    |                |          |                                 |   |                                                                                                            |  |  |  |  |  |  |  |  |  |  |  |  |  |  |  |  |  |  |  |  |  |
| Strut length(um)                                                        |                |          |                                 |   |                                                                                                            |  |  |  |  |  |  |  |  |  |  |  |  |  |  |  |  |  |  |  |  |  |
| No.1,2, 3(clockwise)                                                    |                |          |                                 |   |                                                                                                            |  |  |  |  |  |  |  |  |  |  |  |  |  |  |  |  |  |  |  |  |  |
| Distance from spine corner to strut attachment position(um)             |                |          |                                 |   |                                                                                                            |  |  |  |  |  |  |  |  |  |  |  |  |  |  |  |  |  |  |  |  |  |
| No.1,2. 3(clockwise)                                                    |                |          |                                 |   |                                                                                                            |  |  |  |  |  |  |  |  |  |  |  |  |  |  |  |  |  |  |  |  |  |
| Basal pike length(um)                                                   |                |          |                                 |   |                                                                                                            |  |  |  |  |  |  |  |  |  |  |  |  |  |  |  |  |  |  |  |  |  |
| No.1,2. 3(clockwise)                                                    |                |          |                                 |   |                                                                                                            |  |  |  |  |  |  |  |  |  |  |  |  |  |  |  |  |  |  |  |  |  |
| Distance from strut to basal pike attachment position(um)               |                |          |                                 |   |                                                                                                            |  |  |  |  |  |  |  |  |  |  |  |  |  |  |  |  |  |  |  |  |  |
| (clockwise)                                                             |                |          |                                 |   |                                                                                                            |  |  |  |  |  |  |  |  |  |  |  |  |  |  |  |  |  |  |  |  |  |
| No.1,2, 3                                                               |                |          |                                 |   |                                                                                                            |  |  |  |  |  |  |  |  |  |  |  |  |  |  |  |  |  |  |  |  |  |
| Bezier curve length(um)                                                 |                |          |                                 |   |                                                                                                            |  |  |  |  |  |  |  |  |  |  |  |  |  |  |  |  |  |  |  |  |  |
| (clockwise)                                                             |                |          |                                 |   |                                                                                                            |  |  |  |  |  |  |  |  |  |  |  |  |  |  |  |  |  |  |  |  |  |
| No.1,2, 3, 4, 5, 6                                                      |                |          |                                 |   |                                                                                                            |  |  |  |  |  |  |  |  |  |  |  |  |  |  |  |  |  |  |  |  |  |
|                                                                         |                |          |                                 |   |                                                                                                            |  |  |  |  |  |  |  |  |  |  |  |  |  |  |  |  |  |  |  |  |  |
| "MORLTM", "                                                             | 1- 18", "A", " | NO.1-18  | PIKE-ON SHORT-SP-->BP OFF       | " | "L3", 108, 10, 8, 9, 8, 49, 49, 45, 14, 12, 15, 25, 24, 23, 0, 0, 0, 0, 0, 0, 27, 25, 25, 26, 24, 23       |  |  |  |  |  |  |  |  |  |  |  |  |  |  |  |  |  |  |  |  |  |
| "MORLTM", "                                                             | 1-154", "A", " | NO.1-154 | PIKE-ON SHORT-SP->BP OFF        | " | "L3", 118, 10, 6, 8, 7, 31, 31, 30, 7, 9, 8, 15, 16, 14, 0, 0, 0, 0, 0, 0, 17, 16, 18, 17, 15, 16          |  |  |  |  |  |  |  |  |  |  |  |  |  |  |  |  |  |  |  |  |  |
| "MORLTM", "                                                             | 1-159", "A", " | NO.1-159 | PIKE-ON SHORT-SP                | " | "L3", 57, 10, 10, 11, 10, 60, 62, 57, 20, 15, 19, 29, 32, 29, 34, 32, 28, 3, 2, 6, 31, 31, 34, 32, 30, 29  |  |  |  |  |  |  |  |  |  |  |  |  |  |  |  |  |  |  |  |  |  |
| "MORLTM", "                                                             | 1-160", "A", " | NO.1-160 | SHORT-SP PIKE-ON                | " | "L3", 119, 10, 6, 7, 9, 41, 42, 39, 9, 12, 10, 20, 20, 21, 20, 20, 21, 0, 0, 0, 22, 23, 21, 24, 22, 18     |  |  |  |  |  |  |  |  |  |  |  |  |  |  |  |  |  |  |  |  |  |
| "MORLTM", "                                                             | 1-161", "A", " | NO.1-161 | SHORT-SP PIKE-ON                | " | "L3", 57, 10, 5, 13, 6, 57, 53, 57, 18, 18, 14, 28, 27, 29, 31, 28, 28, 3, 2, 3, 30, 30, 28, 27, 31, 29    |  |  |  |  |  |  |  |  |  |  |  |  |  |  |  |  |  |  |  |  |  |
| "MORLTM", "                                                             | 1-166", "A", " | NO.1-166 | SHORT-SP PIKE-ON                | " | "L3", 106, 10, 3, 7, 4, 49, 55, 52, 14, 15, 14, 25, 28, 26, 25, 28, 26, 1, 0, 1, 26, 25, 29, 29, 27, 26    |  |  |  |  |  |  |  |  |  |  |  |  |  |  |  |  |  |  |  |  |  |
| "MORLTM", "                                                             | 1-167", "A", " | NO.1-167 | SHORT-SP PIKE-ON->BP OFF        | " | "L3", 61, 10, 9, 12, 11, 58, 61, 59, 18, 17, 14, 29, 31, 31, 0, 0, 0, 0, 0, 0, 32, 31, 33, 32, 32, 29      |  |  |  |  |  |  |  |  |  |  |  |  |  |  |  |  |  |  |  |  |  |
| "MORLTM", "                                                             | 1-170", "A", " | NO.1-170 | SHORT-SP PIKE-ON                | " | "L3", 58, 10, 8, 10, 8, 62, 58, 59, 20, 17, 19, 32, 29, 30, 31, 29, 29, 1, 1, 1, 33, 32, 31, 31, 31, 31    |  |  |  |  |  |  |  |  |  |  |  |  |  |  |  |  |  |  |  |  |  |
| "MORLTM", "                                                             | 1-172", "A", " | NO.1-172 | PIKE-ON SHORT-SP                | " | "L3", 57, 10, 7, 7, 5, 56, 52, 59, 12, 15, 15, 28, 26, 29, 27, 26, 29, 2, 1, 1, 29, 29, 27, 27, 31, 31     |  |  |  |  |  |  |  |  |  |  |  |  |  |  |  |  |  |  |  |  |  |
| "MORLTM", "                                                             | 1-179", "A", " | NO.1-179 | SHORT-SP PIKE-ON                | " | "L3", 109, 10, 7, 5, 6, 56, 57, 55, 17, 17, 14, 25, 31, 27, 27, 31, 28, 2, 2, 3, 26, 32, 33, 28, 29, 29    |  |  |  |  |  |  |  |  |  |  |  |  |  |  |  |  |  |  |  |  |  |
| "MORLTM", "                                                             | 1-180", "A", " | NO.1-180 | SHORT-SP PIKE-ON                | " | "L3", 115, 10, 9, 7, 7, 53, 50, 52, 17, 15, 16, 26, 26, 25, 24, 26, 25, 3, 1, 2, 27, 29, 27, 26, 26, 28    |  |  |  |  |  |  |  |  |  |  |  |  |  |  |  |  |  |  |  |  |  |
| "MORLTM", "                                                             | 1-181", "A", " | NO.1-181 | SHORT-SP PIKE-ON SKELETON-THICK | " | "L3", 100, 10, 6, 7, 7, 59, 65, 61, 19, 20, 20, 28, 32, 28, 28, 32, 29, 2, 4, 1, 31, 33, 35, 36, 31, 34    |  |  |  |  |  |  |  |  |  |  |  |  |  |  |  |  |  |  |  |  |  |
| "MORLTM", "                                                             | 1-182", "A", " | NO.1-182 | SHORT-SP PIKE-ON                | " | "L3", 57, 10, 7, 10, 10, 59, 61, 59, 15, 24, 21, 29, 29, 31, 28, 29, 29, 6, 3, 5, 30, 32, 31, 33, 33, 32   |  |  |  |  |  |  |  |  |  |  |  |  |  |  |  |  |  |  |  |  |  |
| "MORLTM", "                                                             | 1-184", "A", " | NO.1-184 | PIKE-ON SHORT-SP                | " | "L3", 117, 10, 4, 4, 4, 31, 31, 32, 9, 9, 9, 16, 15, 16, 17, 17, 17, 0, 0, 0, 17, 16, 17, 17, 17, 17       |  |  |  |  |  |  |  |  |  |  |  |  |  |  |  |  |  |  |  |  |  |
| "MORLTM", "                                                             | 1-185", "A", " | NO.1-185 | SHORT-SP PIKE-ON                | " | "L3", 120, 10, 9, 3, 8, 44, 40, 47, 12, 12, 13, 22, 19, 26, 22, 21, 26, 1, 1, 1, 23, 23, 20, 22, 27, 22    |  |  |  |  |  |  |  |  |  |  |  |  |  |  |  |  |  |  |  |  |  |
| "MORLTM", "                                                             | 1-194", "A", " | NO.1-194 | SHORT-SP PIKE-ON                | " | "L3", 120, 10, 6, 7, 4, 48, 46, 46, 16, 13, 18, 25, 21, 21, 25, 26, 23, 2, 2, 3, 27, 24, 22, 27, 23, 26    |  |  |  |  |  |  |  |  |  |  |  |  |  |  |  |  |  |  |  |  |  |
| "MORLTM", "                                                             | 1-195", "A", " | NO.1-195 | PIKE-ON SHORT-SP                | " | "L3", 115, 10, 5, 5, 6, 48, 46, 48, 15, 16, 21, 25, 20, 25, 25, 21, 25, 6, 7, 3, 27, 25, 22, 28, 26, 25    |  |  |  |  |  |  |  |  |  |  |  |  |  |  |  |  |  |  |  |  |  |
| "MORLTM", "                                                             | 1-198", "A", " | NO.1-198 | SHORT-SP PIKE-ON                | " | "L3", 113, 10, 5, 5, 4, 55, 54, 59, 17, 21, 18, 24, 26, 30, 26, 27, 30, 1, 1, 2, 26, 32, 28, 29, 32, 31    |  |  |  |  |  |  |  |  |  |  |  |  |  |  |  |  |  |  |  |  |  |
| "MORLTM", "                                                             | 1-199", "A", " | NO.1-199 | SHORT-SP PIKE-ON                | " | "L3", 106, 10, 7, 8, 6, 57, 62, 56, 19, 18, 18, 30, 30, 29, 29, 33, 27, 4, 4, 2, 32, 29, 32, 34, 31, 28    |  |  |  |  |  |  |  |  |  |  |  |  |  |  |  |  |  |  |  |  |  |
| "MORLTM", "                                                             | 1-200", "A", " | NO.1-200 | SHORT-SP PIKE-ON                | " | "L3", 103, 10, 9, 10, 10, 49, 53, 51, 17, 13, 19, 26, 24, 24, 25, 24, 24, 4, 11, 3, 27, 24, 26, 30, 25, 28 |  |  |  |  |  |  |  |  |  |  |  |  |  |  |  |  |  |  |  |  |  |
| "MORLTM", "                                                             | 1-202", "A", " | NO.1-202 | SHORT-SP PIKE-ON                | " | "L3", 117, 10, 3, 4, 3, 28, 27, 29, 10, 10, 8, 13, 14, 15, 14, 14, 1, 0, 1, 15, 15, 15, 15, 16, 15         |  |  |  |  |  |  |  |  |  |  |  |  |  |  |  |  |  |  |  |  |  |
| "MORLTM", "                                                             | 1-206", "A", " | NO.1-206 | SHORT-SP PIKE-ON                | " | "L3", 106, 10, 11, 9, 6, 50, 53, 58, 17, 15, 15, 25, 26, 28, 27, 26, 28, 2, 0, 1, 27, 26, 28, 28, 30, 32   |  |  |  |  |  |  |  |  |  |  |  |  |  |  |  |  |  |  |  |  |  |
| "MORLTM", "                                                             | 1-210", "A", " | NO.1-210 | SHORT-SP PIKE-ON                | " | "L3", 110, 10, 10, 9, 10, 52, 49, 52, 17, 16, 18, 27, 24, 26, 28, 23, 26, 4, 1, 4, 29, 27, 25, 25, 28, 28  |  |  |  |  |  |  |  |  |  |  |  |  |  |  |  |  |  |  |  |  |  |
| "MORLTM", "                                                             | 1-211", "A", " | NO.1-211 | SHORT-SP PIKE-ON                | " | "L3", 104, 10, 6, 8, 6, 54, 58, 55, 22, 14, 17, 28, 30, 26, 28, 30, 25, 1, 1, 2, 30, 27, 32, 30, 27, 30    |  |  |  |  |  |  |  |  |  |  |  |  |  |  |  |  |  |  |  |  |  |
| "MORLTM", "                                                             | 1-214", "A", " | NO.1-214 | PIKE-ON SHORT-SP                | " | "L3", 58, 10, 15, 14, 13, 66, 60, 65, 18, 16, 18, 34, 29, 33, 33, 29, 32, 6, 3, 4, 35, 33, 31, 32, 35, 33  |  |  |  |  |  |  |  |  |  |  |  |  |  |  |  |  |  |  |  |  |  |

|             |                        |                           |                                                                                                              |
|-------------|------------------------|---------------------------|--------------------------------------------------------------------------------------------------------------|
| "MORLTM", " | 1-220", "A", "NO.1-220 | SHORT-SP PIKE-ON          | ", "L3", 95, 10, 8, 9, 6, 60, 61, 52, 17, 15, 16, 30, 31, 27, 32, 31, 27, 2, 2, 1, 34, 31, 34, 31, 29, 26    |
| "MORLTM", " | 1-221", "A", "NO.1-221 | SHORT-SP PIKE-ON          | ", "L3", 109, 10, 7, 9, 8, 54, 51, 54, 15, 22, 17, 27, 24, 26, 27, 24, 26, 3, 3, 7, 28, 29, 26, 28, 28, 29   |
| "MORLTM", " | 1-222", "A", "NO.1-222 | SHORT-SP PIKE-ON          | ", "L3", 58, 10, 8, 8, 6, 60, 61, 58, 20, 17, 22, 33, 29, 28, 32, 29, 29, 2, 6, 2, 35, 30, 31, 34, 30, 32    |
| "MORLTM", " | 1-219", "A", "NO.1-219 | SHORT-SP PIKE-ON          | ", "L3", 118, 10, 6, 7, 4, 53, 40, 52, 9, 14, 13, 28, 19, 22, 31, 19, 22, 3, 1, 1, 29, 26, 21, 22, 25, 31    |
| "MORLTM", " | 1-227", "A", "NO.1-227 | SHORT-SP PIKE-ON-->BP OFF | ", "L3", 108, 10, 9, 9, 8, 49, 50, 50, 15, 12, 14, 23, 25, 24, 0, 0, 0, 0, 0, 0, 24, 27, 26, 26, 26, 27      |
| "MORLTM", " | 1-228", "A", "NO.1-228 | SHORT-SP PIKE-ON          | ", "L3", 117, 10, 4, 4, 6, 50, 50, 49, 17, 15, 15, 26, 24, 23, 26, 25, 25, 2, 2, 1, 27, 25, 26, 27, 25, 27   |
| "MORLTM", " | 1-232", "A", "NO.1-232 | SHORT-SP PIKE-ON-->BP OFF | ", "L3", 116, 10, 4, 5, 5, 32, 35, 36, 11, 11, 10, 16, 18, 18, 0, 0, 0, 0, 0, 0, 17, 17, 20, 18, 20, 20      |
| "MORLTM", " | 1-242", "A", "NO.1-242 | PIKE-ON SHORT-SP          | ", "L3", 118, 10, 11, 4, 8, 42, 47, 46, 13, 9, 13, 24, 22, 23, 23, 23, 24, 1, 1, 1, 25, 19, 24, 25, 24, 24   |
| "MORLTM", " | 1-244", "A", "NO.1-244 | SHORT-SP PIKE-ON          | ", "L3", 118, 10, 5, 7, 7, 37, 38, 34, 12, 12, 11, 19, 19, 19, 19, 19, 1, 0, 1, 20, 19, 21, 21, 20, 16       |
| "MORLTM", " | 1-245", "A", "NO.1-245 | SHORT-SP PIKE-ON          | ", "L3", 96, 10, 13, 12, 12, 52, 58, 52, 13, 16, 15, 25, 30, 27, 23, 30, 25, 2, 3, 2, 26, 27, 31, 29, 28, 27 |
| "MORLTM", " | 1-246", "A", "NO.1-246 | SHORT-SP PIKE-ON          | ", "L3", 118, 10, 5, 5, 5, 57, 55, 56, 15, 17, 18, 29, 27, 28, 29, 27, 24, 1, 1, 1, 31, 30, 28, 30, 29, 31   |
| "MORLTM", " | 1-248", "A", "NO.1-248 | SHORT-SP PIKE-ON-->BP OFF | ", "L3", 117, 10, 5, 8, 8, 43, 48, 47, 15, 13, 14, 20, 25, 24, 0, 0, 0, 0, 0, 0, 21, 24, 27, 24, 25, 25      |
| "MORLTM", " | 1-252", "A", "NO.1-252 | SHORT-SP PIKE-ON          | ", "L3", 118, 10, 7, 6, 7, 44, 50, 50, 15, 16, 14, 21, 26, 26, 23, 26, 26, 2, 2, 2, 23, 23, 29, 25, 28, 26   |
| "MORLTM", " | 1-258", "A", "NO.1-258 | SHORT-SP PIKE-ON          | ", "L3", 116, 10, 6, 5, 6, 57, 56, 58, 17, 18, 17, 28, 29, 28, 26, 26, 27, 3, 2, 5, 29, 30, 31, 30, 29, 31   |
| "MORLTM", " | 1-261", "A", "NO.1-261 | SHORT-SP PIKE-ON          | ", "L3", 98, 10, 7, 7, 13, 52, 56, 51, 14, 15, 17, 27, 27, 28, 25, 30, 29, 4, 4, 3, 28, 26, 29, 30, 30, 25   |
| "MORLTM", " | 1-269", "A", "NO.1-269 | SHORT-SP PIKE-ON          | ", "L3", 117, 10, 9, 8, 10, 42, 43, 43, 13, 16, 12, 20, 22, 22, 21, 22, 23, 2, 2, 3, 22, 23, 23, 22, 24, 22  |
| "MORLTM", " | 1-276", "A", "NO.1-276 | SHORT-SP PIKE-ON          | ", "L3", 117, 10, 10, 9, 6, 33, 37, 36, 11, 11, 9, 17, 18, 17, 17, 18, 17, 1, 0, 1, 18, 17, 20, 20, 18, 20   |
| "MORLTM", " | 1-280", "A", "NO.1-280 | SHORT-SP PIKE-ON          | ", "L3", 110, 10, 7, 8, 8, 57, 57, 54, 16, 17, 14, 26, 30, 28, 30, 30, 27, 2, 2, 2, 28, 32, 31, 28, 29, 27   |
| "MORLTM", " | 1-282", "A", "NO.1-282 | SHORT-SP PIKE-ON          | ", "L3", 111, 10, 8, 9, 7, 53, 52, 54, 20, 19, 16, 27, 27, 27, 27, 27, 3, 4, 4, 28, 29, 29, 26, 28, 29       |
| "MORLTM", " | 1-285", "A", "NO.1-285 | PIKE-ON SHORT-SP          | ", "L3", 58, 10, 12, 11, 10, 54, 52, 56, 14, 16, 15, 25, 25, 28, 25, 25, 27, 2, 3, 2, 27, 30, 26, 28, 29, 29 |
| "MORLTM", " | 1-292", "A", "NO.1-292 | SHORT-SP PIKE-ON-->BP OFF | ", "L3", 116, 10, 8, 8, 8, 46, 48, 48, 13, 14, 14, 23, 23, 23, 0, 0, 0, 0, 0, 0, 24, 25, 25, 27, 25, 26      |
| "MORLTM", " | 1-293", "A", "NO.1-293 | SHORT-SP PIKE-ON          | ", "L3", 115, 10, 6, 6, 6, 53, 50, 53, 14, 18, 15, 24, 24, 27, 24, 24, 27, 2, 1, 3, 26, 30, 26, 27, 29, 27   |
| "MORLTM", " | 1-295", "A", "NO.1-295 | SHORT-SP PIKE-ON          | ", "L3", 118, 10, 10, 8, 8, 41, 41, 44, 12, 12, 12, 21, 20, 20, 21, 21, 21, 1, 0, 1, 23, 21, 22, 21, 22, 24  |
| "MORLTM", " | 1-298", "A", "NO.1-298 | SHORT-SP PIKE-ON          | ", "L3", 112, 10, 6, 6, 5, 52, 51, 53, 14, 17, 17, 27, 24, 26, 27, 25, 27, 1, 5, 4, 29, 26, 25, 28, 28, 27   |
| "MORLTM", " | 1-303", "4", "NO.1-303 | PIKE-ON SHORT-SP          | ", "L3", 58, 10, 11, 13, 12, 54, 58, 58, 17, 15, 15, 27, 29, 27, 27, 29, 26, 2, 1, 1, 28, 27, 33, 31, 28, 34 |
| "MORLTM", " | 1-302", "A", "NO.1-302 | SHORT-SP PIKE-ON          | ", "L3", 107, 10, 9, 7, 12, 51, 53, 52, 17, 13, 17, 23, 27, 24, 25, 28, 28, 2, 4, 5, 24, 29, 29, 28, 25, 28  |
| "MORLTM", " | 1-308", "A", "NO.1-308 | SHORT-SP PIKE-ON          | ", "L3", 59, 10, 7, 6, 11, 59, 64, 57, 18, 18, 18, 28, 31, 30, 27, 32, 30, 3, 5, 3, 29, 33, 33, 35, 31, 28   |
| "MORLTM", " | 1-315", "A", "NO.1-315 | SHORT-SP PIKE-ON          | ", "L3", 118, 10, 7, 7, 6, 32, 32, 32, 9, 10, 8, 15, 16, 15, 16, 15, 3, 1, 1, 16, 17, 17, 17, 17, 17         |
| "MORLTM", " | 1-317", "A", "NO.1-317 | SHORT-SP PIKE-ON          | ", "L3", 110, 10, 8, 9, 8, 52, 49, 45, 15, 15, 15, 26, 25, 22, 25, 24, 23, 3, 4, 4, 28, 28, 26, 26, 23, 24   |
| "MORLTM", " | 1-321", "A", "NO.1-321 | SHORT-SP PIKE-ON-->BP OFF | ", "L3", 59, 10, 10, 8, 8, 62, 61, 63, 18, 20, 19, 30, 28, 30, 0, 0, 0, 0, 0, 0, 32, 33, 30, 33, 31, 35      |
| "MORLTM", " | 1-324", "A", "NO.1-324 | SHORT-SP PIKE-ON-->BP OFF | ", "L3", 115, 10, 7, 8, 7, 43, 46, 42, 13, 13, 11, 20, 24, 21, 0, 0, 0, 0, 0, 0, 22, 23, 26, 23, 22, 21      |
| "MORLTM", " | 1-331", "A", "NO.1-331 | SHORT-SP PIKE-ON          | ", "L3", 58, 10, 5, 9, 7, 64, 66, 62, 19, 17, 18, 31, 34, 31, 31, 34, 31, 1, 0, 1, 33, 35, 36, 33, 33, 32    |
| "MORLTM", " | 1-339", "A", "NO.1-339 | SHORT-SP PIKE-ON          | ", "L3", 58, 10, 12, 9, 11, 53, 50, 51, 12, 17, 16, 25, 24, 26, 26, 23, 25, 1, 1, 0, 27, 30, 25, 27, 28, 26  |
| "MORLTM", " | 1-340", "A", "NO.1-340 | SHORT-SP PIKE-ON          | ", "L3", 114, 10, 7, 9, 9, 44, 49, 45, 15, 13, 14, 22, 23, 22, 23, 22, 2, 3, 4, 23, 23, 25, 27, 24, 25       |
| "MORLTM", " | 1-344", "A", "NO.1-344 | SHORT-SP PIKE-ON          | ", "L3", 119, 10, 9, 9, 6, 42, 41, 44, 13, 12, 13, 21, 21, 24, 21, 21, 24, 2, 3, 4, 24, 22, 23, 21, 26, 21   |
| "MORLTM", " | 1-454", "A", "NO.1-454 | SHORT-SP PIKE-ON          | ", "L3", 116, 10, 9, 9, 6, 47, 48, 53, 15, 14, 14, 25, 23, 26, 24, 23, 26, 4, 3, 5, 27, 23, 24, 26, 27, 28   |
| "MORLTM", " | 1-459", "A", "NO.1-459 | SHORT-SP PIKE-ON-->BP OFF | ", "L3", 117, 10, 8, 10, 8, 43, 44, 37, 13, 11, 12, 21, 22, 19, 0, 0, 0, 0, 0, 0, 23, 23, 24, 23, 20, 19     |
| "MORLTM", " | 1-463", "A", "NO.1-463 | PIKE-ON SHORT-SP          | ", "L3", 106, 10, 5, 8, 8, 52, 55, 53, 17, 16, 16, 25, 28, 26, 26, 28, 26, 2, 2, 3, 28, 28, 29, 29, 27, 28   |
| "MORLTM", " | 1-466", "A", "NO.1-466 | SHORT-SP PIKE-ON          | ", "L3", 106, 10, 9, 11, 9, 48, 47, 44, 14, 14, 15, 25, 21, 22, 24, 21, 22, 1, 4, 1, 27, 25, 23, 27, 24, 23  |
| "MORLTM", " | 1-467", "A", "NO.1-467 | SHORT-SP PIKE-ON          | ", "L3", 102, 10, 6, 9, 11, 45, 49, 46, 15, 13, 14, 21, 24, 25, 22, 24, 25, 1, 2, 1, 22, 25, 26, 25, 26, 22  |
| "MORLTM", " | 1-471", "A", "NO.1-471 | SHORT-SP PIKE-ON          | ", "L3", 118, 10, 11, 5, 8, 46, 45, 49, 13, 15, 13, 24, 22, 25, 24, 22, 25, 1, 0, 1, 26, 23, 23, 25, 27, 25  |
| "MORLTM", " | 1-475", "A", "NO.1-475 | PIKE-ON SHORT-SP          | ", "L3", 95, 10, 8, 8, 9, 54, 55, 55, 17, 15, 15, 27, 27, 27, 26, 27, 28, 2, 2, 3, 29, 28, 29, 30, 28, 29    |
| "MORLTM", " | 1-483", "A", "NO.1-483 | SPINE-SEMILONG PIKE-ON    | ", "L3", 59, 10, 17, 13, 15, 74, 67, 69, 19, 18, 21, 36, 34, 34, 36, 34, 34, 1, 0, 1, 39, 40, 36, 35, 37, 36 |
| "MORLTM", " | 1-496", "A", "NO.1-496 | SHORT-SP PIKE-ON          | ", "L3", 59, 10, 8, 7, 10, 56, 54, 56, 16, 18, 14, 28, 27, 29, 28, 27, 29, 1, 0, 1, 30, 29, 28, 28, 31, 28   |
| "MORLTM", " | 1-498", "A", "NO.1-498 | SHORT-SP PIKE-ON          | ", "L3", 119, 10, 5, 6, 6, 35, 34, 32, 13, 9, 12, 18, 17, 15, 18, 17, 16, 1, 0, 1, 20, 19, 19, 18, 17, 17    |
| "MORLTM", " | 1-499", "A", "NO.1-499 | SHORT-SP PIKE-ON          | ", "L3", 117, 10, 6, 8, 7, 41, 42, 36, 11, 12, 11, 20, 21, 18, 20, 22, 18, 1, 0, 0, 22, 22, 23, 23, 19, 20   |
| "MORLTM", " | 3-838", "C", "NO.3-838 | SHORT-SP PIKE-ON          | ", "L2", 84, 10, 4, 6, 6, 30, 34, 31, 10, 11, 10, 15, 18, 15, 16, 18, 13, 1, 2, 1, 16, 16, 20, 18, 17, 17    |
| "MORLTM", " | 3-840", "C", "NO.3-840 | NO-PIKE SHORT-SP-->BP OFF | ", "L2", 82, 10, 8, 8, 6, 41, 39, 42, 13, 12, 12, 20, 20, 21, 0, 0, 0, 0, 0, 0, 22, 22, 21, 21, 22, 22       |
| "MORLTM", " | 3-841", "C", "NO.3-841 | SHORT-SP PIKE-ON-->BP OFF | ", "L2", 82, 10, 12, 11, 10, 49, 45, 50, 13, 14, 14, 24, 23, 25, 0, 0, 0, 0, 0, 0, 25, 26, 24, 23, 27, 25    |
| "MORLTM", " | 3-843", "C", "NO.3-843 | PIKE-ON SHORT-SP-->BP OFF | ", "L2", 84, 10, 10, 7, 7, 40, 39, 41, 14, 12, 13, 19, 20, 20, 0, 0, 0, 0, 0, 0, 21, 23, 21, 20, 22, 22      |
| "MORLTM", " | 3-846", "C", "NO.3-846 | PIKE-ON SHORT-SP          | ", "L2", 84, 10, 7, 5, 5, 54, 55, 57, 14, 22, 18, 28, 25, 28, 28, 26, 29, 3, 1, 4, 30, 27, 27, 31, 30, 30    |
| "MORLTM", " | 3-849", "C", "NO.3-849 | PIKE-OFF SHORT-SP         | ", "L2", 83, 10, 7, 8, 8, 47, 45, 45, 16, 13, 13, 23, 24, 22, 0, 0, 0, 0, 0, 0, 24, 26, 25, 23, 23, 24       |
| "MORLTM", " | 3-855", "C", "NO.3-855 | SHORT-SP PIKE-ON          | ", "L2", 82, 10, 7, 8, 9, 55, 61, 58, 20, 19, 16, 27, 30, 30, 29, 30, 30, 4, 2, 3, 28, 30, 32, 32, 32, 30    |

|                                                             |                                                                                                              |
|-------------------------------------------------------------|--------------------------------------------------------------------------------------------------------------|
| "MORLTM", "3-857", "C", "NO.3-857 SHORT-SP PIKE-ON          | ", "L2", 83, 10, 7, 6, 4, 34, 26, 32, 9, 7, 9, 16, 13, 14, 15, 12, 16, 1, 1, 1, 18, 18, 14, 14, 16, 19       |
| "MORLTM", "3-860", "C", "NO.3-860 SHORT-SP PIKE-OFF         | ", "L2", 83, 10, 7, 6, 7, 63, 61, 60, 20, 23, 20, 30, 30, 30, 0, 0, 0, 0, 0, 0, 32, 36, 33, 33, 32, 32       |
| "MORLTM", "3-867", "C", "NO.3-867 SHORT-SP PIKE-ON          | ", "L2", 83, 10, 11, 10, 7, 47, 50, 47, 14, 13, 14, 22, 23, 24, 23, 24, 23, 2, 2, 1, 24, 25, 25, 28, 25, 25  |
| "MORLTM", "3-868", "C", "NO.3-868 SHORT-SP PIKE-ON          | ", "L2", 84, 10, 9, 8, 9, 37, 40, 38, 12, 10, 12, 18, 19, 19, 19, 19, 1, 2, 2, 19, 20, 20, 23, 21, 20        |
| "MORLTM", "3-870", "C", "NO.3-870 SHORT-SP PIKE-ON          | ", "L2", 82, 10, 8, 5, 6, 35, 35, 39, 12, 9, 11, 18, 17, 18, 17, 18, 2, 3, 1, 19, 19, 18, 19, 20, 23         |
| "MORLTM", "3-874", "C", "NO.3-874 PIKE-ON SHORT-SP          | ", "L2", 83, 10, 9, 9, 10, 49, 51, 54, 15, 15, 15, 25, 25, 28, 25, 25, 28, 2, 2, 3, 27, 25, 27, 28, 29, 28   |
| "MORLTM", "3-880", "C", "NO.3-880 SHORT-SP PIKE-ON          | ", "L2", 83, 10, 5, 6, 5, 34, 35, 35, 12, 13, 10, 16, 17, 18, 15, 17, 18, 1, 1, 2, 17, 19, 18, 19, 19, 18    |
| "MORLTM", "3-899", "C", "NO.3-899 SHORT-SP PIKE-ON          | ", "L2", 85, 10, 9, 7, 9, 53, 54, 51, 13, 19, 18, 26, 26, 29, 27, 25, 29, 3, 4, 1, 28, 28, 28, 29, 30, 23    |
| "MORLTM", "3-901", "C", "NO.3-901 SHORT-SP PIKE-ON-->BP OFF | ", "L2", 85, 10, 8, 9, 8, 50, 48, 52, 13, 15, 13, 24, 23, 27, 0, 0, 0, 0, 0, 0, 25, 28, 24, 26, 28, 26       |
| "MORLTM", "4-124", "A", "NO.1-124 PIKE-ON SHORT-SP          | ", "L3", 109, 10, 11, 11, 8, 47, 50, 47, 16, 13, 15, 23, 26, 22, 23, 27, 25, 2, 1, 2, 25, 25, 27, 25, 24, 26 |
| "MORLTM", "4-139", "C", "NO.4-139 SHORT-SP PIKE-ON          | ", "L3", 106, 10, 11, 7, 9, 45, 42, 47, 14, 13, 15, 24, 19, 22, 21, 19, 22, 4, 1, 4, 26, 22, 21, 24, 24, 26  |
| "MORLTM", "4-141", "A", "NO.4-141 SHORT-SP PIKE-ON          | ", "L3", 117, 10, 9, 6, 4, 47, 47, 48, 14, 14, 14, 24, 23, 24, 26, 23, 24, 1, 0, 1, 25, 24, 24, 25, 25, 24   |
| "MORLTM", "4-152", "A", "NO.4-152 SHORT-SP PIKE-OFF         | ", "L3", 116, 10, 10, 8, 10, 43, 47, 46, 17, 14, 15, 22, 25, 25, 0, 0, 0, 0, 0, 0, 24, 22, 27, 23, 26, 22    |
| "MORLTM", "TRI-573", "C", "NO.TRI-573 PIKE-ON SHORT-SP      | ", "L2", 85, 10, 9, 7, 10, 52, 49, 54, 14, 16, 17, 27, 24, 25, 24, 24, 26, 3, 4, 2, 28, 27, 26, 26, 27, 30   |
| "MORLTM", "TRI-574", "C", "NO.TRI-574 SHORT-SP PIKE-ON      | ", "L2", 81, 10, 7, 7, 8, 39, 45, 43, 12, 10, 13, 20, 22, 22, 21, 22, 21, 1, 1, 2, 21, 20, 24, 24, 24, 21    |
| "MORLTM", "TRI-584", "C", "NO.TRI-584 PIKE-ON SHORT-SP      | ", "L2", 82, 10, 8, 6, 8, 42, 39, 41, 12, 13, 13, 20, 18, 20, 22, 19, 19, 2, 1, 1, 22, 23, 19, 21, 22, 21    |
| "MORLTM", "TRI-587", "C", "NO.TRI-587 PIKE-ON SHORT-SP      | ", "L2", 82, 10, 11, 11, 12, 56, 58, 57, 15, 18, 19, 27, 30, 30, 27, 29, 30, 1, 2, 1, 29, 30, 32, 29, 33, 28 |
| "MORLTM", "TRI-590", "C", "NO.TRI-590 SHORT-SP PIKE-ON      | ", "L2", 83, 10, 6, 5, 6, 43, 36, 41, 11, 13, 12, 20, 17, 20, 22, 17, 20, 1, 1, 1, 22, 24, 18, 20, 21, 23    |
| "MORLTM", "TRI-592", "C", "NO.TRI-592 SHORT-SP PIKE-ON      | ", "L2", 83, 10, 9, 11, 10, 64, 63, 59, 17, 19, 17, 31, 30, 31, 30, 31, 32, 2, 2, 2, 33, 34, 33, 34, 32, 29  |
| "MORLTM", "TRI-594", "C", "NO.TRI-594 SHORT-SP PIKE-ON      | ", "L2", 83, 10, 7, 6, 6, 38, 32, 37, 10, 10, 12, 18, 16, 19, 16, 16, 17, 1, 1, 1, 19, 22, 17, 16, 20, 20    |
| "MORLTM", "TRI-596", "C", "NO.TRI-596 SHORT-SP PIKE-ON      | ", "L2", 84, 10, 7, 11, 10, 49, 44, 48, 13, 14, 12, 23, 22, 25, 24, 22, 25, 3, 2, 1, 25, 28, 24, 23, 27, 25  |
| "MORLTM", "TRI-598", "C", "NO.TRI-598 SHORT-SP PIKE-ON      | ", "L2", 84, 10, 4, 6, 4, 31, 32, 27, 10, 10, 11, 16, 16, 14, 15, 15, 12, 1, 1, 2, 18, 16, 17, 17, 15, 14    |
| "MORLTM", "TRI-599", "C", "NO.TRI-599 LONG-SP PIKE-ON       | ", "L2", 83, 10, 14, 10, 12, 37, 33, 38, 9, 10, 9, 19, 15, 19, 19, 14, 20, 1, 1, 1, 20, 19, 16, 19, 20, 19   |
| "MORLTM", "TRI-624", "C", "NO.TRI-624 PIKE-ON SHORT-SP      | ", "L2", 82, 10, 8, 8, 10, 52, 56, 57, 15, 16, 16, 26, 28, 29, 26, 28, 28, 2, 1, 1, 28, 28, 31, 29, 31, 30   |
| "MORLTM", "TRI-626", "C", "NO.TRI-626 SHORT-SP NO-PIKE      | ", "L2", 79, 10, 8, 13, 10, 59, 59, 63, 18, 19, 16, 31, 27, 31, 0, 0, 0, 0, 0, 0, 33, 29, 30, 33, 32, 34     |
| "MORLTM", "TRI-628", "C", "NO.TRI-628 SHORT-SP PIKE-ON      | ", "L2", 86, 10, 8, 9, 9, 40, 36, 40, 11, 11, 11, 19, 17, 19, 19, 18, 21, 2, 2, 3, 21, 22, 18, 20, 21, 22    |
| "MORLTM", "TRI-630", "C", "NO.TRI-630 SHORT-SP PIKE-ON      | ", "L2", 82, 10, 11, 10, 9, 40, 36, 41, 12, 12, 10, 19, 18, 20, 21, 18, 21, 2, 0, 3, 21, 22, 20, 19, 22, 22  |
| "MORLTM", "TRI-631", "C", "NO.TRI-631 SHORT-SP PIKE-ON      | ", "L2", 83, 10, 6, 6, 5, 43, 43, 46, 11, 16, 15, 21, 21, 23, 21, 23, 24, 4, 1, 3, 22, 25, 23, 23, 25, 25    |
| "MORLTM", "TRI-633", "C", "NO.TRI-633 SHORT-SP PIKE-ON      | ", "L2", 83, 10, 5, 6, 4, 44, 46, 45, 16, 15, 12, 22, 23, 21, 24, 24, 23, 2, 2, 5, 24, 23, 25, 25, 23, 25    |
| "MORLTM", "TRI-637", "C", "NO.TRI-637 SHORT-SP PIKE-ON      | ", "L2", 81, 10, 4, 8, 9, 46, 42, 43, 12, 14, 14, 24, 21, 22, 24, 22, 24, 2, 3, 3, 25, 24, 22, 22, 23, 22    |
| "MORLTM", "TRI-638", "C", "NO.TRI-638 SHORT-SP PIKE-ON      | ", "L2", 83, 10, 7, 5, 4, 39, 42, 39, 12, 15, 13, 18, 20, 20, 18, 20, 20, 1, 1, 1, 19, 23, 21, 23, 22, 21    |
| "MORLTM", "TRI-643", "C", "NO.TRI-643 SHORT-SP PIKE-ON      | ", "L2", 83, 10, 3, 6, 7, 37, 32, 35, 11, 9, 12, 18, 15, 17, 18, 15, 17, 1, 1, 1, 19, 21, 16, 18, 18, 19     |
| "MORLTM", "TRI-646", "C", "NO.TRI-646 SHORT-SP PIKE-ON      | ", "L2", 84, 10, 8, 9, 9, 55, 54, 53, 14, 17, 17, 28, 26, 28, 28, 28, 27, 3, 2, 3, 29, 29, 27, 30, 30, 26    |
| "MORLTM", "TRI-648", "C", "NO.TRI-648 SHORT-SP PIKE-ON      | ", "L2", 83, 10, 6, 8, 10, 56, 56, 54, 15, 18, 18, 29, 27, 29, 26, 30, 26, 2, 2, 1, 30, 29, 29, 30, 30, 26   |
| "MORLTM", "TRI-649", "C", "NO.TRI-649 SHORT-SP PIKE-ON      | ", "L2", 82, 10, 10, 10, 9, 49, 45, 45, 13, 14, 12, 25, 24, 26, 24, 24, 23, 3, 1, 4, 26, 26, 25, 22, 28, 20  |
| "MORLTM", "TRI-650", "C", "NO.TRI-650 NO-PIKE SHORT-SP      | ", "L2", 81, 10, 6, 8, 8, 35, 36, 32, 12, 12, 12, 18, 18, 16, 0, 0, 0, 0, 0, 0, 19, 19, 20, 19, 18, 18       |
| "MORLTM", "TRI-663", "C", "NO.TRI-663 SHORT-SP NO-PIKE      | ", "L2", 84, 10, 9, 7, 11, 52, 56, 56, 16, 15, 17, 26, 28, 28, 0, 0, 0, 0, 0, 0, 27, 27, 30, 29, 30, 30      |
| "MORLTM", "TRI-666", "C", "NO.TRI-666 SHORT-SP PIKE-ON      | ", "L2", 84, 10, 8, 5, 5, 36, 32, 37, 11, 12, 10, 17, 16, 19, 20, 15, 20, 0, 0, 1, 19, 20, 18, 17, 21, 19    |
| "MORLTM", "TRI-704", "C", "NO.TRI-704 SHORT-SP PIKE-ON      | ", "L2", 83, 10, 8, 7, 4, 56, 54, 60, 19, 19, 16, 28, 28, 28, 30, 30, 30, 2, 4, 5, 29, 29, 30, 28, 29, 33    |
| "MORLTM", "TRI-705", "C", "NO.TRI-705 SHORT-SP PIKE-ON      | ", "L2", 83, 10, 7, 8, 10, 48, 52, 50, 14, 14, 14, 23, 28, 26, 23, 30, 26, 1, 1, 1, 25, 26, 30, 25, 27, 26   |
| "MORLTM", "TRI-718", "C", "NO.TRI-718 SHORT-SP PIKE-ON      | ", "L2", 82, 10, 6, 7, 7, 49, 43, 47, 13, 14, 15, 25, 21, 24, 25, 21, 22, 1, 1, 1, 26, 25, 23, 23, 25, 25    |
| "MORLTM", "TRI-719", "C", "NO.TRI-719 SHORT-SP PIKE-ON      | ", "L2", 84, 10, 13, 10, 8, 53, 52, 53, 13, 15, 14, 26, 25, 26, 27, 27, 25, 2, 2, 3, 27, 28, 26, 28, 28, 27  |
| "MORLTM", "TRI-738", "C", "NO.TRI-738 PIKE-ON SHORT-SP      | ", "L2", 83, 10, 8, 11, 10, 45, 43, 47, 12, 11, 13, 23, 20, 23, 23, 21, 22, 1, 2, 2, 24, 23, 22, 23, 25, 26  |
| "MORLTM", "TRI-752", "C", "NO.TRI-752 SHORT-SP PIKE-ON      | ", "L2", 83, 10, 6, 5, 5, 30, 35, 34, 11, 12, 12, 16, 18, 17, 15, 18, 16, 2, 2, 1, 17, 15, 19, 19, 19, 18    |
| "MORLTM", "TRI-756", "C", "NO.TRI-756 PIKE-ON SHORT-SP      | ", "L2", 83, 10, 6, 4, 6, 53, 54, 55, 18, 17, 18, 25, 28, 29, 26, 28, 28, 2, 4, 4, 27, 29, 31, 27, 31, 29    |
| "MORLTM", "TRI-758", "C", "NO.TRI-758 SHORT-SP PIKE-ON      | ", "L2", 84, 10, 10, 10, 9, 53, 55, 53, 16, 15, 14, 27, 26, 27, 27, 27, 27, 2, 1, 3, 29, 26, 28, 31, 28, 27  |
| "MORLTM", "TRI-760", "C", "NO.TRI-760 SHORT-SP PIKE-ON      | ", "L2", 83, 10, 6, 9, 10, 49, 47, 45, 10, 14, 14, 25, 21, 23, 26, 22, 20, 3, 1, 1, 26, 25, 23, 27, 24, 23   |
| "MORLTM", "TRI-760", "C", "NO.TRI-760 SHORT-SP PIKE-ON      | ", "L2", 82, 10, 8, 10, 9, 37, 40, 36, 12, 14, 12, 17, 20, 18, 19, 20, 18, 4, 4, 3, 18, 21, 22, 21, 19, 20   |
| "MORLTM", "TRI-774", "C", "NO.TRI-774 SHORT-SP PIKE-ON      | ", "L2", 83, 10, 9, 7, 5, 47, 41, 46, 14, 13, 13, 23, 21, 24, 23, 21, 24, 1, 1, 1, 24, 26, 22, 20, 25, 24    |
| "MORLTM", "TRI-780", "C", "NO.TRI-780 SEMILONG-SP PIKE-ON   | ", "L2", 84, 10, 11, 10, 7, 47, 45, 49, 15, 14, 10, 21, 23, 25, 22, 21, 25, 1, 1, 1, 23, 27, 24, 23, 27, 24  |
| "MORLTM", "TRI-785", "C", "NO.TRI-785 SEMILONG-SP PIKE-ON   | ", "L2", 83, 10, 12, 12, 12, 49, 52, 53, 14, 18, 15, 23, 25, 26, 24, 26, 26, 1, 2, 1, 25, 26, 27, 28, 27, 29 |
| "MORLTM", "TRI-791", "C", "NO.TRI-791 SHORT-SP PIKE-ON      | ", "L2", 83, 10, 7, 7, 7, 54, 55, 52, 15, 18, 15, 27, 27, 26, 26, 26, 27, 1, 1, 1, 28, 28, 29, 29, 27, 27    |
| "MORLTM", "TRI-796", "C", "NO.TRI-796 SHORT-SP PIKE-ON TINY | ", "L2", 82, 10, 4, 4, 3, 25, 22, 25, 8, 8, 6, 12, 11, 13, 12, 11, 13, 0, 1, 1, 13, 15, 13, 11, 14, 13       |

|           |            |      |                                           |    |       |     |     |     |     |     |     |     |     |     |     |     |     |     |     |     |     |     |    |    |    |     |     |     |     |     |    |
|-----------|------------|------|-------------------------------------------|----|-------|-----|-----|-----|-----|-----|-----|-----|-----|-----|-----|-----|-----|-----|-----|-----|-----|-----|----|----|----|-----|-----|-----|-----|-----|----|
| "MORLTM", | "TRI-804", | "C", | "NO.TRI-804 SEMILONG-SP PIKE-ON           | ", | "L2", | 83, | 10, | 13, | 11, | 10, | 50, | 49, | 50, | 15, | 14, | 15, | 25, | 25, | 26, | 25, | 25, | 26, | 0, | 2, | 0, | 26, | 26, | 27, | 25, | 28, | 25 |
| "MORLTM", | "TRI-805", | "C", | "NO.TRI-805 SHORT-SP PIKE-ON              | ", | "L2", | 83, | 10, | 5,  | 7,  | 6,  | 37, | 38, | 33, | 12, | 11, | 13, | 17, | 18, | 16, | 18, | 17, | 16, | 1, | 2, | 1, | 19, | 21, | 19, | 22, | 18, | 18 |
| "MORLTM", | "TRI-814", | "C", | "NO.TRI-814 SHORT-SP PIKE-ON HANAITEs TYP | ", | "L2", | 83, | 10, | 9,  | 6,  | 9,  | 47, | 39, | 48, | 12, | 12, | 11, | 22, | 20, | 23, | 22, | 20, | 23, | 1, | 0, | 0, | 23, | 26, | 21, | 20, | 26, | 27 |
| "MORLTM", | "TRI-818", | "C", | "NO.TRI-818 SHORT-SP PIKE-ON              | ", | "L2", | 83, | 10, | 8,  | 14, | 12, | 51, | 54, | 53, | 16, | 16, | 12, | 26, | 27, | 27, | 27, | 27, | 27, | 5, | 2, | 4, | 28, | 26, | 29, | 27, | 28, | 27 |
| "MORLTM", | "TRI-819", | "C", | "NO.TRI-819 SEMI-LONG SPINE PIKE-ON       | ", | "L2", | 84, | 10, | 14, | 11, | 13, | 59, | 56, | 57, | 13, | 17, | 17, | 28, | 27, | 28, | 29, | 26, | 29, | 2, | 3, | 2, | 30, | 31, | 29, | 31, | 30, | 30 |
| "MORLTM", | "TRI-830", | "C", | "NO.TRI-830 SHORT-SP PIKE-ON              | ", | "L2", | 83, | 10, | 7,  | 5,  | 6,  | 58, | 55, | 53, | 19, | 20, | 19, | 31, | 28, | 27, | 35, | 28, | 29, | 1, | 2, | 3, | 33, | 29, | 30, | 28, | 29, | 27 |
| "MORLTM", | "TRI-830", | "C", | "NO.TRI-830B SHORT-SP PIKE-ON             | ", | "L2", | 84, | 10, | 12, | 10, | 11, | 51, | 51, | 51, | 14, | 17, | 14, | 25, | 26, | 26, | 27, | 26, | 27, | 3, | 1, | 2, | 26, | 27, | 27, | 27, | 28, | 26 |
| "MORLTM", | "X- 1",    | "C", | "NO.X-001 PIKE-UNKNOWN SHORT-SP           | ", | "L2", | 83, | 10, | 11, | 12, | 9,  | 60, | 59, | 59, | 18, | 15, | 16, | 29, | 30, | 28, | 0,  | 0,  | 0,  | 0, | 0, | 0, | 31, | 32, | 31, | 30, | 30, | 32 |
| "MORLTM", | "X- 9",    | "C", | "NO.X-009 SHORT-SP PIKE-ON                | ", | "L2", | 83, | 10, | 6,  | 8,  | 6,  | 51, | 54, | 54, | 18, | 16, | 15, | 26, | 27, | 25, | 27, | 27, | 25, | 4, | 2, | 2, | 28, | 26, | 30, | 28, | 27, | 31 |
| "MORLTM", | "TRI-626", | "C", | "NO.TRI-626(TINY SHORT-SP NO-BP           | ", | "L2", | 80, | 10, | 6,  | 6,  | 3,  | 29, | 31, | 29, | 11, | 10, | 10, | 15, | 15, | 14, | 0,  | 0,  | 0,  | 0, | 0, | 0, | 17, | 15, | 16, | 17, | 15, | 16 |
| "MORLTM", | "X- 10",   | "C", | "NO.X-010 PIKE-OFF SEMILONG-SP            | ", | "L2", | 82, | 10, | 9,  | 8,  | 8,  | 40, | 41, | 41, | 10, | 12, | 11, | 19, | 20, | 20, | 0,  | 0,  | 0,  | 0, | 0, | 0, | 21, | 21, | 22, | 21, | 22, | 22 |
| "MORLTM", | "X- 11",   | "C", | "NO.X-011 PIKE-ON SHORT-SP                | ", | "L2", | 82, | 10, | 6,  | 6,  | 5,  | 52, | 51, | 49, | 17, | 16, | 16, | 27, | 26, | 24, | 26, | 26, | 24, | 2, | 1, | 1, | 29, | 27, | 27, | 27, | 26, | 26 |
| "MORLTM", | "X-354",   | "C", | "NO.X-354 PIKE-ON SEMILONG-SP             | ", | "L2", | 83, | 10, | 9,  | 8,  | 7,  | 44, | 37, | 44, | 13, | 12, | 12, | 22, | 18, | 21, | 21, | 19, | 22, | 1, | 1, | 2, | 23, | 23, | 19, | 20, | 23, | 24 |
| "MORLTM", | "X-355",   | "C", | "NO.X-355 BP-ON SHORT-SP                  | ", | "L2", | 82, | 10, | 9,  | 10, | 10, | 39, | 41, | 42, | 11, | 14, | 14, | 19, | 20, | 21, | 20, | 20, | 22, | 1, | 1, | 1, | 20, | 22, | 22, | 22, | 23, | 22 |
| "MORLTM", | "X-356",   | "C", | "NO.X-356 BP-ON SHORT-SP                  | ", | "L2", | 84, | 10, | 8,  | 6,  | 10, | 55, | 51, | 55, | 14, | 19, | 15, | 25, | 24, | 29, | 28, | 24, | 27, | 6, | 1, | 3, | 26, | 32, | 26, | 27, | 30, | 28 |
| "MORLTM", | "X-362",   | "C", | "NO.X-362 PIKE-OFF HANAITEs? SEMILONG-SP  | ", | "L2", | 82, | 10, | 9,  | 10, | 12, | 51, | 54, | 48, | 12, | 12, | 14, | 27, | 28, | 20, | 0,  | 0,  | 0,  | 0, | 0, | 0, | 28, | 26, | 29, | 29, | 20, | 30 |
| "MORLTM", | "X-364",   | "C", | "NO.X-364 SPINE-SEMILONG BP-ON            | ", | "L2", | 83, | 10, | 9,  | 7,  | 8,  | 44, | 41, | 46, | 12, | 11, | 13, | 21, | 19, | 22, | 20, | 21, | 24, | 2, | 2, | 2, | 22, | 24, | 20, | 23, | 24, | 25 |
| "MORLTM", | "X-370",   | "C", | "NO.X-370 SHORT-SP NO-BP                  | ", | "L2", | 82, | 10, | 7,  | 6,  | 7,  | 40, | 34, | 40, | 13, | 12, | 11, | 20, | 17, | 19, | 0,  | 0,  | 0,  | 0, | 0, | 0, | 22, | 21, | 18, | 18, | 21, | 21 |
| "MORLTM", | "X-371",   | "C", | "NO.X-371 SHORT-SP PIKE-ON                | ", | "L2", | 83, | 10, | 6,  | 8,  | 7,  | 38, | 40, | 36, | 13, | 10, | 11, | 19, | 18, | 17, | 19, | 21, | 20, | 1, | 2, | 2, | 21, | 20, | 20, | 23, | 19, | 20 |
| "MORLTM", | "X-373",   | "C", | "NO.X-373 BP-OFF SEMILONG-SP              | ", | "L2", | 85, | 10, | 10, | 12, | 12, | 49, | 51, | 49, | 15, | 14, | 16, | 26, | 26, | 25, | 0,  | 0,  | 0,  | 0, | 0, | 0, | 27, | 25, | 27, | 27, | 27, | 24 |
| "MORLTM", | "X-376",   | "C", | "NO.X-376 BP-ON SHORT-SP                  | ", | "L2", | 83, | 10, | 7,  | 9,  | 8,  | 53, | 56, | 49, | 14, | 18, | 17, | 25, | 26, | 29, | 27, | 26, | 29, | 4, | 5, | 3, | 27, | 29, | 28, | 32, | 30, | 21 |
| "MORLTM", | "X-377",   | "C", | "NO.X-377 SHORT-SP PIKE-ON                | ", | "L2", | 84, | 10, | 7,  | 6,  | 10, | 37, | 42, | 43, | 13, | 12, | 10, | 17, | 21, | 20, | 18, | 21, | 21, | 3, | 1, | 2, | 18, | 21, | 23, | 22, | 21, | 24 |
| "MORLTM", | "X-378",   | "C", | "NO.X-378 SHORT-SP PIKE-ON                | ", | "L2", | 84, | 10, | 6,  | 5,  | 5,  | 35, | 31, | 35, | 11, | 13, | 9,  | 17, | 16, | 18, | 18, | 15, | 17, | 1, | 1, | 2, | 19, | 20, | 17, | 16, | 20, | 18 |
| "MORLTM", | "X-381",   | "C", | "NO.X-381 SEMILONG-SP BP-ON               | ", | "L2", | 78, | 10, | 11, | 8,  | 10, | 48, | 43, | 47, | 13, | 14, | 16, | 25, | 21, | 23, | 26, | 22, | 22, | 2, | 2, | 2, | 26, | 25, | 23, | 23, | 25, | 25 |
| "MORLTM", | "X-381",   | "C", | "NO.X-381B SHORT-SP PIKE-ON               | ", | "L2", | 83, | 10, | 7,  | 8,  | 8,  | 51, | 52, | 47, | 19, | 13, | 18, | 24, | 27, | 24, | 23, | 26, | 23, | 1, | 3, | 1, | 26, | 28, | 29, | 27, | 25, | 25 |
| "MORLTM", | "X-384",   | "C", | "NO.X-384 HANAITEs? SEMILONG-SP BP-ON     | ", | "L2", | 83, | 10, | 14, | 11, | 11, | 58, | 47, | 53, | 17, | 14, | 16, | 29, | 25, | 25, | 29, | 25, | 26, | 3, | 5, | 4, | 31, | 31, | 26, | 23, | 27, | 29 |
| "MORLTM", | "X-388",   | "C", | "NO.X-388 BP-ON SHORT-SP                  | ", | "L2", | 82, | 10, | 8,  | 6,  | 8,  | 52, | 52, | 55, | 18, | 18, | 18, | 25, | 26, | 27, | 24, | 26, | 27, | 1, | 2, | 2, | 27, | 28, | 27, | 28, | 28, | 30 |
| "MORLTM", | "X-390",   | "C", | "NO.X-390 SHORT-SP BP-ON                  | ", | "L2", | 81, | 10, | 7,  | 6,  | 6,  | 33, | 30, | 34, | 11, | 12, | 11, | 16, | 15, | 17, | 17, | 17, | 18, | 2, | 2, | 1, | 18, | 18, | 17, | 16, | 19, | 19 |
| "MORLTM", | "X-394",   | "C", | "NO.X-394 BP-ON SEMILONG-SP               | ", | "L2", | 82, | 10, | 15, | 10, | 12, | 55, | 53, | 55, | 13, | 14, | 15, | 29, | 24, | 26, | 29, | 24, | 27, | 1, | 2, | 2, | 31, | 26, | 25, | 30, | 28, | 30 |
| "MORLTM", | "X-397",   | "C", | "NO.X-397 BP-UNKNOWN SHORT-SP             | ", | "L2", | 82, | 10, | 6,  | 6,  | 5,  | 49, | 48, | 51, | 15, | 15, | 16, | 26, | 22, | 26, | 0,  | 0,  | 0,  | 0, | 0, | 0, | 27, | 25, | 23, | 27, | 27, | 27 |
| "MORLTM", | "X-398",   | "C", | "NO.X-398 BP-UNKNOWN SHORT-SP             | ", | "L2", | 84, | 10, | 8,  | 7,  | 5,  | 59, | 56, | 60, | 18, | 20, | 19, | 32, | 26, | 30, | 0,  | 0,  | 0,  | 0, | 0, | 0, | 34, | 29, | 28, | 31, | 32, | 31 |
| "MORLTM", | "X-400",   | "C", | "NO.X-400 SP-SHORT BP-ON                  | ", | "L2", | 83, | 10, | 6,  | 7,  | 5,  | 50, | 42, | 51, | 13, | 13, | 12, | 25, | 20, | 26, | 25, | 20, | 25, | 3, | 1, | 1, | 27, | 26, | 22, | 23, | 28, | 25 |
| "MORLTM", | "X-401",   | "C", | "NO.X-401 BP-ON SHORT-SP                  | ", | "L2", | 82, | 10, | 7,  | 7,  | 6,  | 63, | 58, | 62, | 21, | 18, | 19, | 31, | 30, | 31, | 32, | 29, | 30, | 3, | 4, | 3, | 33, | 35, | 32, | 29, | 33, | 33 |
| "MORLTM", | "X-402",   | "C", | "NO.X-402 BP-ON SHORT-SP                  | ", | "L2", | 84, | 10, | 8,  | 8,  | 8,  | 64, | 54, | 62, | 16, | 17, | 18, | 31, | 24, | 32, | 30, | 22, | 31, | 5, | 7, | 4, | 33, | 36, | 25, | 31, | 34, | 32 |
| "MORLTM", | "X-404",   | "C", | "NO.X-404 SHORT-SP BP-ON                  | ", | "L2", | 84, | 10, | 13, | 9,  | 8,  | 56, | 54, | 54, | 15, | 19, | 17, | 30, | 26, | 30, | 26, | 27, | 28, | 6, | 3, | 7, | 32, | 27, | 27, | 30, | 32, | 26 |
| "MORLTM", | "X-405",   | "C", | "NO.X-405 BP-ON SEMILONG-SP               | ", | "L2", | 84, | 10, | 11, | 11, | 5,  | 52, | 52, | 50, | 16, | 13, | 15, | 26, | 25, | 24, | 25, | 24, | 26, | 2, | 2, | 2, | 28, | 27, | 26, | 30, | 26, | 27 |
| "MORLTM", | "X-418",   | "C", | "NO.X-418 SHORT-SP BP-ON HANAITEs TYPE    | ", | "L2", | 84, | 10, | 5,  | 5,  | 4,  | 27, | 23, | 28, | 10, | 9,  | 7,  | 12, | 11, | 14, | 12, | 11, | 14, | 2, | 2, | 1, | 14, | 17, | 12, | 12, | 16, | 15 |
| "MORLTM", | "X-421",   | "C", | "NO.X-421 BP-ON SHORT-SP                  | ", | "L2", | 83, | 10, | 9,  | 9,  | 9,  | 49, | 50, | 54, | 18, | 16, | 16, | 25, | 22, | 28, | 24, | 22, | 26, | 7, | 5, | 8, | 27, | 25, | 24, | 29, | 29, | 27 |
| "MORLTM", | "X-424",   | "C", | "NO.X-424 SHORT-SP BP-ON                  | ", | "L2", | 85, | 10, | 5,  | 5,  | 6,  | 60, | 57, | 57, | 19, | 17, | 17, | 30, | 28, | 28, | 31, | 29, | 29, | 1, | 2, | 1, | 32, | 32, | 30, | 29, | 30, | 30 |
| "MORLTM", | "X-427",   | "C", | "NO.X-427 BP-ON SEMILONG-SP               | ", | "L2", | 85, | 10, | 11, | 10, | 11, | 48, | 51, | 55, | 15, | 15, | 12, | 23, | 26, | 28, | 24, | 26, | 27, | 1, | 1, | 1, | 24, | 26, | 28, | 27, | 29, | 28 |
| "MORLTM", | "X-433",   | "C", | "NO.X-433 BP-ON SHORT-SP                  | ", | "L2", | 85, | 10, | 5,  | 6,  | 6,  | 60, | 57, | 57, | 18, | 18, | 17, | 30, | 27, | 28, | 29, | 28, | 28, | 2, | 2, | 3, | 32, | 31, | 29, | 31, | 29, | 30 |
| "MORLTM", | "X-442",   | "C", | "NO.X-442 SEMILONG-SP BP-ON               | ", | "L2", | 84, | 10, | 9,  | 10, | 9,  | 45, | 47, | 45, | 15, | 11, | 13, | 22, | 23, | 22, | 22, | 25, | 25, | 2, | 2, | 4, | 24, | 24, | 25, | 25, | 23, | 24 |
| "MORLTM", | "X-446",   | "C", | "NO.X-446 BP-ON SHORT-SP                  | ", | "L2", | 84, | 10, | 8,  | 6,  | 7,  | 59, | 63, | 66, | 18, | 16, | 19, | 30, | 31, | 32, | 28, | 31, | 33, | 3, | 1, | 2, | 31, | 30, | 34, | 34, | 33, | 36 |
| "MORLTM", | "X-506",   | "C", | "NO.X-506 SHORT-SP BP-ON HANAITEs TYPE    | ", | "L2", | 83, | 10, | 3,  | 5,  | 6,  | 35, | 31, | 34, | 10, | 11, | 10, | 19, | 14, | 18, | 18, | 15, | 17, | 1, | 1, | 2, | 20, | 18, | 16, | 17, | 19, | 17 |
| "MORLTM", | "X-509",   | "C", | "NO.X-509 SHORT-SP BP-ON                  | ", | "L2", | 82, | 10, | 6,  | 5,  | 7,  | 49, | 50, | 52, | 12, | 14, | 15, | 25, | 23, | 28, | 25, | 23, | 25, | 2, | 2, | 1, | 26, | 25, | 24, | 28, | 29, | 25 |
| "MORLTM", | "X-510",   | "C", | "NO.X-510 BP-ON SHORT-SP                  | ", | "L2", | 82, | 10, | 6,  | 6,  | 5,  | 54, | 53, | 47, | 14, | 16, | 15, | 25, | 25, | 23, | 29, | 29, | 24, | 7, | 1, | 3, | 26, | 31, | 27, | 30, | 25, | 24 |
| "MORLTM", | "X-512",   | "C", | "NO.X-512 SHORT-SP BP-ON                  | ", | "L2", | 84, | 10, | 4,  | 4,  | 4,  | 48, | 50, | 48, | 16, | 17, | 14, | 22, | 26, | 24, | 21, | 24, | 22, | 1, | 1, | 3, | 24, | 27, | 27, | 25, | 25, | 25 |
| "MORLTM", | "X-514",   | "C", | "NO.X-514 BP-ON SEMILONG-SP               | ", | "L2", | 85, | 10, | 6,  | 11, | 12, | 50, | 50, | 49, | 11, | 14, | 13, | 24, | 25, | 24, | 24, | 25, | 25, | 1, | 1, | 2, | 25, | 26, | 26, | 27, | 26, | 26 |
| "MORLTM", | "X-530",   | "C", | "NO.X-530 SEMILONG-SP BP-ON               | ", | "L2", | 84, | 10, | 10, | 9,  | 7,  | 54, | 52, | 54, | 13, | 20, | 15, | 21, | 23, | 26, | 22, | 23, | 25, | 5, | 3, | 6, | 22, | 34, | 24, | 29, | 27, | 29 |
| "MORLTM", | "X-543",   | "C", | "NO.X-543 SHORT-SP BP-ON HANAITEs TYPE    | ", | "L2", | 84, | 10, | 8,  | 7,  | 7,  | 47, | 41, | 46, | 14, | 14, | 12, | 22, | 20, | 24, | 22, | 20, | 24, | 1, | 1, | 1, | 23, | 26, | 21, | 22, | 26, | 24 |
| "MORLTM", | "X-571",   | "C", | "NO.X-571 BP-ON SHORT-SP HANAITEs TYPE    | ", | "L2", | 83, | 10, | 5,  | 4,  | 4,  | 30, | 27, | 31, | 10, | 10, | 9,  | 14, | 14, | 16, | 13, | 13, | 16, | 2, | 2, | 1, | 16, | 17, | 16, | 14, | 17, | 16 |
