# Supplementary material for: Morphometric analysis of early Eocene &lt;i&gt;Corbisema&lt;/i&gt; skeletons (Silicoflagellata) in Mors, Denmark
Source: Copernicus journal article supplement (doi:10.5194/jm-37-283-2018), 2018-02-07
Supplement: Supplementary file 1 [file jm-37-283-2018-supplement.zip › jm-37-283-2018-supplement-title-page.pdf]

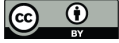

*Supplement of*

**Morphometric analysis of early Eocene *Corbisema* skeletons  
(Silicoflagellata) in Mors, Denmark**

**Hideto Tsutsui et al.**

*Correspondence to:* Hideto Tsutsui (blacksand@mail.goo.ne.jp)

- jm-37-283-2018-supplement-title-page.pdf
- 1\_SILICO\_measure\_data\_long\_spine.pdf
- 2\_SILICO\_measure\_data\_short\_spine.pdf
- Tsutsui et al Supp Info.pdf

The copyright of individual parts of the supplement might differ from the CC BY 4.0 License.
